# Supplementary material for: Copper- or iron-catalyzed stereoselective methylation of enamides using dicumyl peroxide as the methyl source
Source: Royal Society of Chemistry journal article supplement (doi:10.1039/d3nj02949b), 2023-01-01

# Electronic Supplementary Information

**Copper- or Iron-catalyzed stereoselective methylation of enamides**

**with dicumyl peroxide as the methyl source**

Fukuan Zhang, Haidong Liu, Xin-Jian Jia, Lin Li, Yi Liang, Xuzhong Luo,  
Haiqing Luo\*

*<sup>a</sup> Department of Chemistry & Chemical Engineering, Gannan Normal University,  
Ganzhou 341000, China  
E-mail: [luohaiq@sina.com](mailto:luohaiq@sina.com)*

## Table of Contents

|                                                                            |    |
|----------------------------------------------------------------------------|----|
| 1. General experimental methods .....                                      | 3  |
| 2. General procedures for the synthesis of methylated enamides.....        | 3  |
| 3. Free radical capture experiments .....                                  | 4  |
| 4. Competitive reaction studies .....                                      | 4  |
| 5. The method of crystal synthesis .....                                   | 5  |
| 6. Structure analysis X-ray crystallography of 2a .....                    | 5  |
| 7. References .....                                                        | 6  |
| 8. Characterization data for the products.....                             | 7  |
| 9. <sup>1</sup> H NMR and <sup>13</sup> C NMR spectra of the products..... | 15 |

## 1. General experimental methods

Proton nuclear magnetic resonance ( $^1\text{H}$  NMR) and carbon nuclear magnetic resonance ( $^{13}\text{C}$  NMR) spectroscopy were performed on a Bruker Advance 300, 400 and 500 NMR spectrometers. Chemical shifts  $^1\text{H}$  NMR spectra are reported as in units of parts per million (ppm) downfield from  $\text{SiMe}_4$  (0.0) and relative to the signal of chloroform-*d* ( $\delta = 7.264$ , singlet). Multiplicities were given as: s (singlet); d (doublet); t (triplet); q (quartet); dd (doublet of doublets); ddd (doublet of doublets of doublets); dddd (doublet of doublets of doublets of doublets); dt (doublet of triplets); m (multiplets) and etc. The number of protons (*n*) for a given resonance is indicated by *n*H. Coupling constants are reported as a *J* value in Hz. Carbon nuclear magnetic resonance spectra ( $^{13}\text{C}$  NMR) are reported as  $\delta$  in units of parts per million (ppm) downfield from  $\text{SiMe}_4$  (0.0) and relative to the signal of chloroform-*d* ( $\delta = 77.03$ , triplet). High resolution mass spectral analysis (HRMS) was performed on LCMS Q-TOF (SHIMADZU Corporation) ESI spectrometer.

Unless otherwise noted, all reagents were purchased from commercial suppliers (Energy Chemistry; Tansoole) and used without further purification. All enamides were prepared using existing methods.<sup>1,2</sup>

## 2. General procedures for the synthesis of methylated enamides

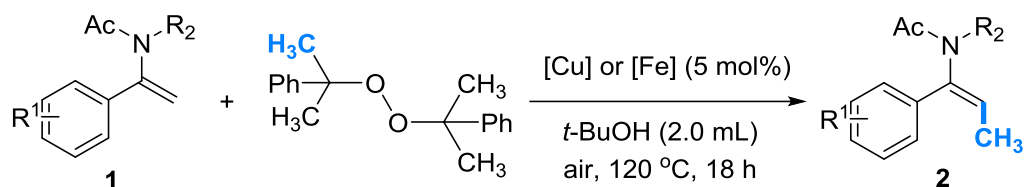

A sealed tube was charged with enamides **1** (0.3 mmol),  $\text{Cu}(\text{OAc})_2 \cdot \text{H}_2\text{O}$  or  $\text{FeCl}_2$  (5 mol%) and dicumyl peroxide (0.6 mmol). Then, 2.0 mL of *t*-BuOH was added as solvent. The mixture was kept stirring under air at 120 °C or 130 °C for 18 h. After completion of the reaction (confirmed by checking TLC), the mixture was poured into water (15 mL) and was extracted with ethylacetate (3 x 15 mL). The combined organic layers were washed with brine (2 x 15 mL) and dried over  $\text{Na}_2\text{SO}_4$ . The residue was purified by flash chromatography on silica gel, eluting with ethylacetate/petroleum ether (1:12~1:6 v/v) to afford the desired products **2**.

### 3. Free radical capture experiments

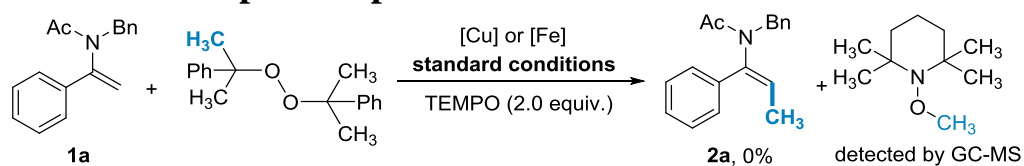

A sealed tube was charged with enamides **1** (0.3 mmol),  $\text{Cu}(\text{OAc})_2 \cdot \text{H}_2\text{O}$  or  $\text{FeCl}_2$  (5 mol%), dicumyl peroxide (0.6 mmol) and 2,2,6,6-tetramethyl-1-piperidin-1-yl methyl ether (TEMPO) (0.6 mmol). Then, 2.0 mL of *t*-BuOH was added as solvent. The mixture was kept stirring under air at 120 °C for 18 h. After the reaction finished, inspection of the crude reaction mixture by GC-MS.

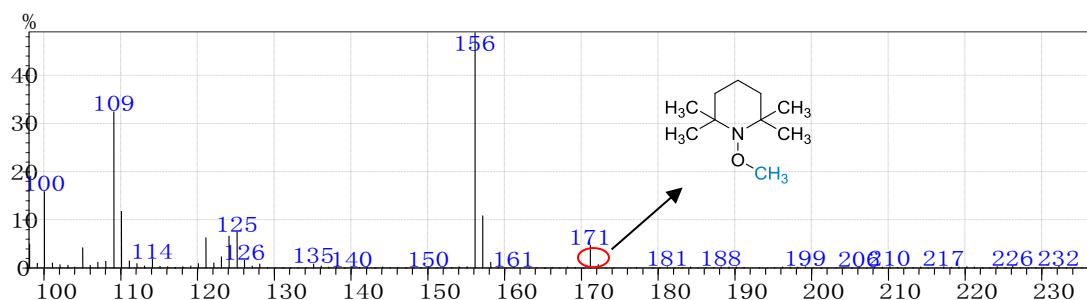

### 4. Competitive reaction studies

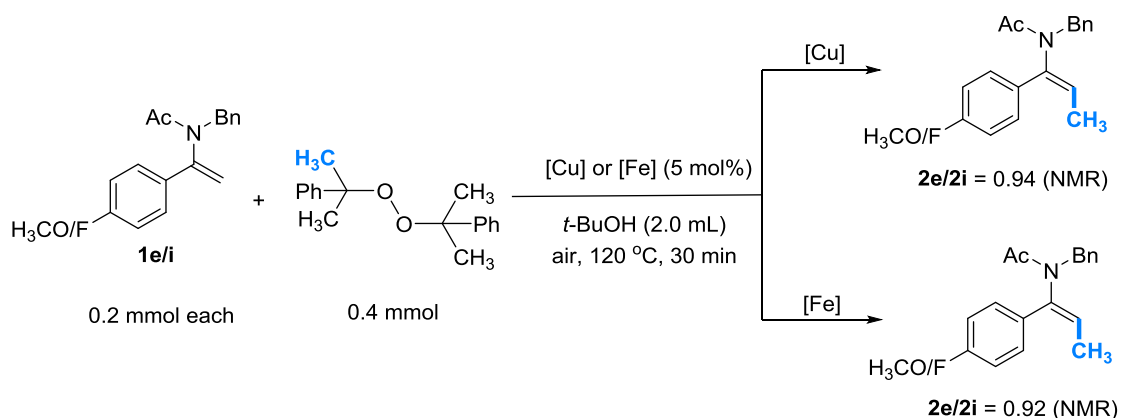

Enamide **1e** (0.2 mmol, 1.0 equiv), enamide **1i** (0.2 mmol, 1.0 equiv),  $\text{Cu}(\text{OAc})_2 \cdot \text{H}_2\text{O}$  or  $\text{FeCl}_2$  (5 mol%) and dicumyl peroxide (0.4 mmol), were dissolved in *t*-BuOH (2.0 mL). The mixture was kept stirring under air at 120 °C for 30 minutes. After the reaction finished, the mixture was removed in vacuum and the product was pale yellow oil. Inspection of the crude reaction mixture by  $^1\text{H}$  NMR spectroscopy showed that the ratio of **2e** to **2i** was approximately 0.94 or 0.92.

## 5. The method of crystal synthesis

Synthesis was carried out by reaction of **1a** (0.3 mmol), Cu(OAc)<sub>2</sub>·H<sub>2</sub>O (5 mol%) and dicumyl peroxide (0.6 mmol) in *t*-BuOH (2.0 mL) under air at 120 °C for 18 h. Single crystals suitable for X-ray analysis were grown from ethylacetate solution of **2a** by slow vapor diffusion of petroleum ether.

## 6. Structure analysis X-ray crystallography of **2a**

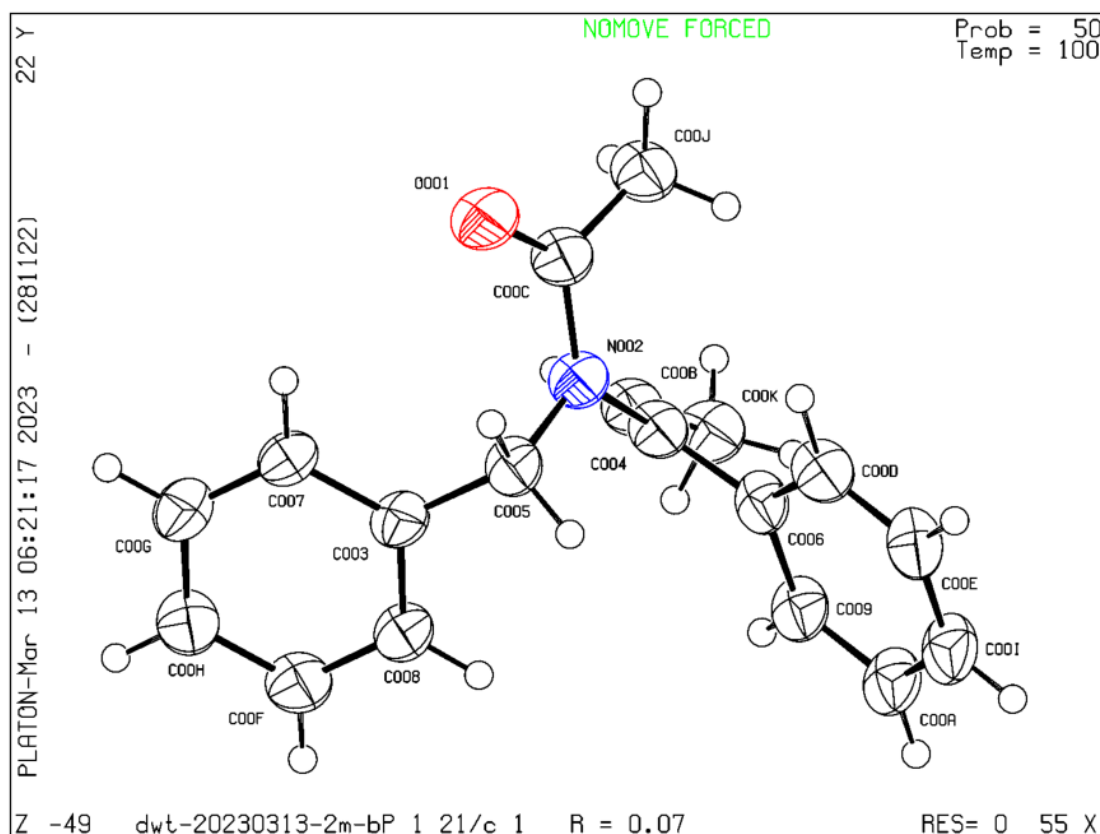

**Figure S1.** Thermal ellipsoid plot of the crystal structure of **2a**

|                     |                                    |
|---------------------|------------------------------------|
| Identification code | <b>2a</b>                          |
| Empirical formula   | C <sub>18</sub> H <sub>19</sub> NO |
| Formula weight      | 265.34                             |
| Temperature         | 100.15 K                           |
| Crystal system      | monoclinic                         |
| Space group         | P2 <sub>1</sub> /c                 |

|                                   |          |                                                               |
|-----------------------------------|----------|---------------------------------------------------------------|
| Unit cell dimensions              | a        | 9.5009(11) Å                                                  |
|                                   | b        | 9.4353(11) Å                                                  |
|                                   | c        | 16.3857(17) Å                                                 |
|                                   | $\alpha$ | 90 °                                                          |
|                                   | $\beta$  | 90.365(11) °                                                  |
|                                   | $\gamma$ | 90 °                                                          |
| Volume                            |          | 1468.8(3) Å <sup>3</sup>                                      |
| Z                                 |          | 4                                                             |
| Density (calculated)              |          | 1.200 g/cm <sup>3</sup>                                       |
| Absorption coefficient            |          | 0.574 μ/mm <sup>-1</sup>                                      |
| F(000)                            |          | 568.0                                                         |
| Crystal size                      |          | 0.1 × 0.1 × 0.1 /mm <sup>3</sup>                              |
| Theta range for data collection   |          | 9.308 to 131.902                                              |
| Index ranges                      |          | -9 ≤ h ≤ 11, -9 ≤ k ≤ 11, -19 ≤ l ≤ 19                        |
| Reflections collected             |          | 8504                                                          |
| Independent reflections           |          | 2407 [R <sub>int</sub> = 0.0508, R <sub>sigma</sub> = 0.0462] |
| Data / restraints / parameters    |          | 2407/0/183                                                    |
| Goodness-of-fit on F <sup>2</sup> |          | 1.043                                                         |
| Final R indices [I > 2σ(I)]       |          | R <sub>1</sub> = 0.0686, wR <sub>2</sub> = 0.1927             |
| R indices (all data)              |          | R <sub>1</sub> = 0.0793, wR <sub>2</sub> = 0.2049             |
| Largest diff. peak and hole       |          | 0.34/-0.25 e Å <sup>-3</sup>                                  |

## 7. References

- 1 X. Li, K. Sun, W. Shen, Y. Zhang, M.-Z. Lu, X. Luo, and H. Luo, Rhodium(III)-Catalyzed Direct C–H Arylation of Various Acyclic Enamides with Arylsilanes, *Org. Lett.* 2021, **23**, 31-36.
- 2 X.-H. Chang, Z.-L. Wang, M. Zhao, C. Yang, J.-J. Li, W.-W. Ma, and Y.-H. Xu, Synthesis of Functionalized Vinylsilanes via Metal-Free Dehydrogenative Silylation of Enamides, *Org. Lett.*, 2020, **22**, 1326-1330.

## 8. Characterization data for the products

### (*E*)-*N*-benzyl-*N*-(1-phenylprop-1-en-1-yl)acetamide (**2a**)

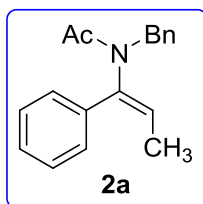

Yellow oil ([Cu] 63.7 mg, 80% yield; [Fe] 60.5 mg, 76% yield): **<sup>1</sup>H NMR** (400 MHz, CDCl<sub>3</sub>) δ 7.42 – 7.31 (m, 3H), 7.29 – 7.22 (m, 5H), 7.21 – 7.18 (m, 2H), 5.43 (q, *J* = 7.3 Hz, 1H), 4.49 (s, 2H), 2.21 (s, 3H), 1.76 (d, *J* = 7.3 Hz, 3H); **<sup>13</sup>C NMR** (101 MHz, CDCl<sub>3</sub>) δ 170.8, 139.1, 137.5, 134.6, 128.7, 128.6, 128.4, 128.3, 128.1, 127.0, 126.7, 48.9, 22.0, 14.3;

**HRMS (ESI) m/z:** [M+Na]<sup>+</sup> Calcd for C<sub>18</sub>H<sub>19</sub>NONa<sup>+</sup> 288.1359, found 288.1366.

### (*E*)-*N*-benzyl-*N*-(1-(*p*-tolyl)prop-1-en-1-yl)acetamide (**2b**)

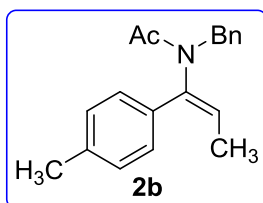

Yellow oil ([Cu] 71.2 mg, 85% yield; [Fe] 64.5 mg, 77% yield): **<sup>1</sup>H NMR** (400 MHz, CDCl<sub>3</sub>) δ 7.29 – 7.23 (m, 3H), 7.22 – 7.20 (m, 2H), 7.20 (s, 2H), 7.18 – 7.14 (m, 2H), 5.38 (q, *J* = 7.3 Hz, 1H), 4.48 (s, 2H), 2.38 (s, 3H), 2.20 (s, 3H), 1.76 (d, *J* = 7.3 Hz, 3H); **<sup>13</sup>C NMR** (101 MHz, CDCl<sub>3</sub>) δ 170.9, 139.1, 138.2, 137.6, 131.7, 129.1, 128.7, 128.5, 128.1, 126.9, 126.1, 48.9, 22.0, 21.1, 14.3;

**HRMS (ESI) m/z:** [M+H]<sup>+</sup> Calcd for C<sub>19</sub>H<sub>22</sub>NO<sup>+</sup> 280.1696, found 280.1704.

### (*E*)-*N*-benzyl-*N*-(1-(*o*-tolyl)prop-1-en-1-yl)acetamide (**2c**)

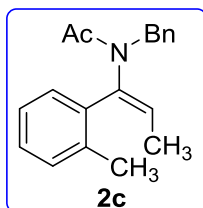

Yellow oil ([Cu] 57.0 mg, 68% yield; [Fe] 60.3 mg, 72% yield): **<sup>1</sup>H NMR** (400 MHz,

CDCl<sub>3</sub>)  $\delta$  7.31 – 7.21 (m, 6H), 7.20 – 7.13 (m, 3H), 5.59 (q,  $J$  = 7.1 Hz, 1H), 4.44 (s, 2H), 2.40 (s, 3H), 2.15 (s, 3H), 1.55 (d,  $J$  = 7.2 Hz, 3H); <sup>13</sup>C NMR (101 MHz, CDCl<sub>3</sub>)  $\delta$  170.9, 138.4, 137.7, 137.3, 133.8, 130.6, 129.3, 128.4, 128.1, 128.0, 126.8, 126.0, 125.8, 48.2, 22.2, 19.5, 14.2;

**HRMS (ESI) m/z:** [M+H]<sup>+</sup> Calcd for C<sub>19</sub>H<sub>22</sub>NO<sup>+</sup> 280.1696, found 280.1705.

**(E)-N-(1-([1,1'-biphenyl]-4-yl)prop-1-en-1-yl)-N-benzylacetamide (2d)**

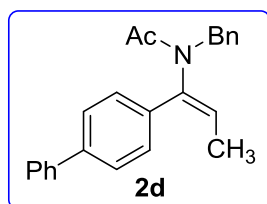

Yellow oil ([Cu] 78.9 mg, 77% yield; [Fe] 60.3 mg, 76% yield): <sup>1</sup>H NMR (400 MHz, CDCl<sub>3</sub>)  $\delta$  7.69 – 7.65 (m, 4H), 7.52 – 7.49 (m, 2H), 7.43 – 7.41 (m, 1H), 7.40 – 7.38 (m, 2H), 7.33 – 7.26 (m, 5H), 5.51 (q,  $J$  = 7.3 Hz, 1H), 4.60 (s, 2H), 2.27 (s, 3H), 1.87 (d,  $J$  = 7.4 Hz, 3H); <sup>13</sup>C NMR (101 MHz, CDCl<sub>3</sub>)  $\delta$  170.8, 140.9, 140.0, 138.8, 137.5, 133.5, 129.6, 128.9, 128.7, 128.0, 127.5, 127.0, 127.0, 126.9, 126.8, 49.0, 22.0, 14.4;

**HRMS (ESI) m/z:** [M+H]<sup>+</sup> Calcd for C<sub>24</sub>H<sub>24</sub>NO<sup>+</sup> 342.1852, found 342.1864.

**(E)-N-benzyl-N-(1-(4-methoxyphenyl)prop-1-en-1-yl)acetamide (2e)**

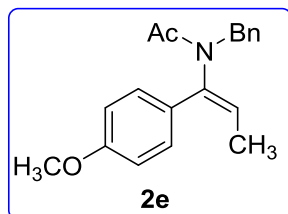

Yellow oil ([Cu] 64.69 mg, 73% yield; [Fe] 65.5 mg, 74% yield): <sup>1</sup>H NMR (400 MHz, CDCl<sub>3</sub>)  $\delta$  7.26 – 7.20 (m, 4H), 7.18 – 7.16 (m, 3H), 6.91 – 6.88 (m, 2H), 5.32 (q,  $J$  = 7.3 Hz, 1H), 4.46 (s, 2H), 3.82 (s, 3H), 2.16 (s, 3H), 1.73 (d,  $J$  = 7.2 Hz, 1H); <sup>13</sup>C NMR (101 MHz, CDCl<sub>3</sub>)  $\delta$  171.0, 159.6, 139.0, 137.8, 130.0, 128.9, 128.2, 127.1, 125.6, 114.0, 113.7, 55.3, 49.1, 22.2, 14.5;

**HRMS (ESI) m/z:** [M+H]<sup>+</sup> Calcd for C<sub>19</sub>H<sub>22</sub>NO<sub>2</sub><sup>+</sup> 296.1645, found 296.1656.

**(E)-N-benzyl-N-(1-(3-methoxyphenyl)prop-1-en-1-yl)acetamide (2f)**



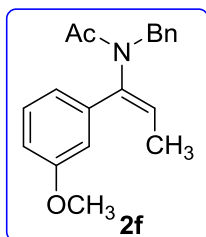

Yellow oil ([Cu] 67.3 mg, 76% yield; [Fe] 62.1 mg, 70% yield):  $^1\text{H NMR}$  (400 MHz,  $\text{CDCl}_3$ )  $\delta$  7.44 – 7.10 (m, 6H), 6.90 – 6.82 (m, 2H), 6.77 – 6.73 (m, 1H), 5.43 (q,  $J$  = 7.3 Hz, 1H), 4.49 (s, 2H), 3.77 (s, 3H), 2.18 (s, 3H), 1.77 (d,  $J$  = 5.5 Hz, 3H);  $^{13}\text{C NMR}$  (101 MHz,  $\text{CDCl}_3$ )  $\delta$  170.8, 159.6, 139.1, 137.6, 136.1, 129.4, 128.8, 128.1, 127.0, 126.9, 121.1, 114.4, 113.5, 55.1, 49.1, 22.0, 14.4;

**HRMS (ESI) m/z:**  $[\text{M}+\text{H}]^+$  Calcd for  $\text{C}_{19}\text{H}_{22}\text{NO}_2^+$  296.1645, found 296.1656.

**(E)-N-benzyl-N-(1-(2,4-dimethoxyphenyl)prop-1-en-1-yl)acetamide (2g)**

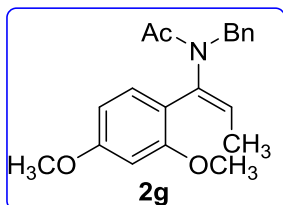

Yellow oil ([Cu] 57.6 mg, 59% yield; [Fe] 69.3 mg, 71% yield):  $^1\text{H NMR}$  (400 MHz,  $\text{CDCl}_3$ )  $\delta$  7.23 – 7.15 (m, 5H), 6.92 (d,  $J$  = 8.2 Hz, 1H), 6.46 – 6.43 (m, 2H), 5.40 (q,  $J$  = 7.1 Hz, 1H), 4.42 (s, 2H), 3.80 (s, 3H), 3.71 (s, 3H), 2.26 (s, 3H), 1.54 (d,  $J$  = 7.1 Hz, 1H);  $^{13}\text{C NMR}$  (101 MHz,  $\text{CDCl}_3$ )  $\delta$  171.3, 161.1, 158.7, 138.0, 137.1, 132.3, 128.4, 127.8, 126.5, 126.4, 115.8, 104.0, 98.4, 55.2, 55.0, 48.2, 22.2, 14.0;

**HRMS (ESI) m/z:**  $[\text{M}+\text{K}]^+$  Calcd for  $\text{C}_{20}\text{H}_{23}\text{NO}_3\text{K}^+$  364.1310, found 364.1322.

**(E)-N-benzyl-N-(1-(3,4,5-trimethoxyphenyl)prop-1-en-1-yl)acetamide (2h)**

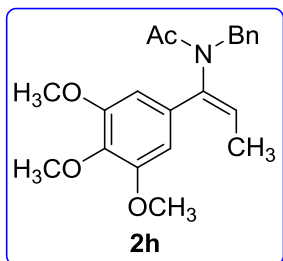

Yellow oil ([Cu] 57.6 mg, 54% yield; [Fe] 66.1 mg, 62% yield):  $^1\text{H NMR}$  (400 MHz,  $\text{CDCl}_3$ )  $\delta$  7.24 – 7.22 (m, 2H), 7.20 – 7.18 (m, 3H), 6.36 (s, 1H), 5.46 (q,  $J$  = 7.3 Hz, 1H), 4.53 (s, 2H), 3.84 (s, 3H), 3.76 (s, 6H), 2.14 (s, 3H), 1.80 (d,  $J$  = 7.4 Hz, 3H);  $^{13}\text{C}$

**NMR** (101 MHz, CDCl<sub>3</sub>)  $\delta$  170.9, 153.1, 139.6, 138.1, 137.6, 130.3, 128.8, 128.1, 127.1, 125.9, 105.9, 60.8, 56.1, 49.7, 22.2, 14.5;

**HRMS (ESI) m/z:** [M+H]<sup>+</sup> Calcd for C<sub>21</sub>H<sub>26</sub>NO<sub>4</sub><sup>+</sup> 356.1856, found 356.1869.

**(E)-N-benzyl-N-(1-(4-fluorophenyl)prop-1-en-1-yl)acetamide (2i)**

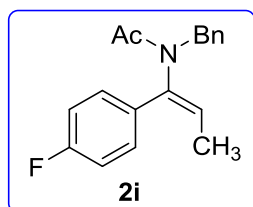

White solid ([Cu] 50.2 mg, 59% yield; [Fe] 47.6 mg, 56% yield): **<sup>1</sup>H NMR** (400 MHz, CDCl<sub>3</sub>)  $\delta$  7.26 – 7.19 (m, 5H), 7.19 – 7.14 (m, 2H), 7.07 (t, *J* = 8.6 Hz, 2H), 5.42 (q, *J* = 7.3 Hz, 1H), 4.47 (s, 2H), 2.18 (s, 3H), 1.73 (d, *J* = 7.3 Hz, 3H); **<sup>13</sup>C NMR** (101 MHz, CDCl<sub>3</sub>)  $\delta$  170.7, 162.3 (d, *J* = 248.8 Hz), 138.30, 137.4, 130.7 (d, *J* = 3.3 Hz), 130.4 (d, *J* = 8.2 Hz), 128.7, 128.1, 127.1, 126.7, 115.5 (d, *J* = 21.6 Hz), 49.0, 22.0, 14.3;

**HRMS (ESI) m/z:** [M+H]<sup>+</sup> Calcd for C<sub>18</sub>H<sub>19</sub>NOF<sup>+</sup> 284.1445, found 284.1455.

**(E)-N-benzyl-N-(1-(4-chlorophenyl)prop-1-en-1-yl)acetamide (2j)**

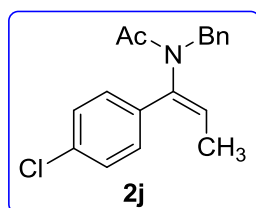

Yellow oil ([Cu] 54.9 mg, 61% yield; [Fe] 64.75 mg, 72% yield): **<sup>1</sup>H NMR** (400 MHz, CDCl<sub>3</sub>)  $\delta$  7.36 – 7.34 (m, 2H), 7.26 – 7.21 (m, 3H), 7.19 – 7.15 (m, 4H), 5.45 (q, *J* = 7.3 Hz, 1H), 4.47 (s, 2H), 2.17 (s, 3H), 1.74 (d, *J* = 7.4 Hz, 3H); **<sup>13</sup>C NMR** (101 MHz, CDCl<sub>3</sub>)  $\delta$  170.8, 138.1, 137.3, 134.1, 133.1, 130.5, 129.9, 128.7, 128.1, 127.4, 127.1, 49.0, 22.0, 14.4;

**HRMS (ESI) m/z:** [M+H]<sup>+</sup> Calcd for C<sub>18</sub>H<sub>19</sub>NOCl<sup>+</sup> 300.1150, found 300.1162.

**(E)-N-benzyl-N-(1-(4-bromophenyl)prop-1-en-1-yl)acetamide (2k)**

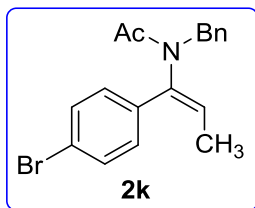

Yellow oil ([Cu] 68.2 mg, 65% yield; [Fe] 65.1 mg, 63% yield): **<sup>1</sup>H NMR** (400 MHz, CDCl<sub>3</sub>) δ 7.51 – 7.49 (m, 2H), 7.26 – 7.20 (m, 3H), 7.17 – 7.14 (m, 2H), 7.12 – 7.08 (m, 2H), 5.45 (q, *J* = 7.3 Hz, 1H), 4.46 (s, 2H), 2.16 (s, 3H), 1.73 (d, *J* = 7.4 Hz, 3H); **<sup>13</sup>C NMR** (101 MHz, CDCl<sub>3</sub>) δ 170.7, 138.2, 137.3, 133.6, 131.6, 130.2, 128.7, 128.1, 127.4, 127.1, 122.3, 49.0, 22.0, 14.4;

**HRMS (ESI) m/z:** [M+H]<sup>+</sup> Calcd for C<sub>18</sub>H<sub>19</sub>NOBr<sup>+</sup> 344.0645, found 344.0659.

**(*E*)-N-benzyl-N-(1-(3-bromophenyl)prop-1-en-1-yl)acetamide (2l)**

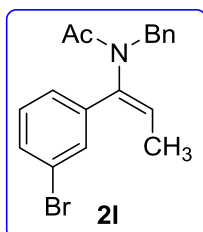

Yellow oil ([Cu] 69.2 mg, 67% yield; [Fe] 67.1 mg, 65% yield): **<sup>1</sup>H NMR** (400 MHz, CDCl<sub>3</sub>) δ 7.46 (d, *J* = 7.9 Hz, 1H), 7.36 (t, *J* = 1.7 Hz, 1H), 7.27 – 7.21 (m, 4H), 7.19 – 7.15 (m, 3H), 5.47 (q, *J* = 7.4 Hz, 1H), 4.48 (s, 2H), 2.17 (s, 3H), 1.76 (d, *J* = 7.4 Hz, 3H); **<sup>13</sup>C NMR** (101 MHz, CDCl<sub>3</sub>) δ 170.8, 137.9, 137.3, 136.9, 131.4, 130.0, 128.7, 128.2, 128.0, 127.3, 127.2, 122.6, 49.1, 22.1, 14.4;

**HRMS (ESI) m/z:** [M+H]<sup>+</sup> Calcd for C<sub>18</sub>H<sub>19</sub>NOBr<sup>+</sup> 344.0645, found 344.0659.

**(*E*)-N-benzyl-N-(1-(4-iodophenyl)prop-1-en-1-yl)acetamide (2m)**

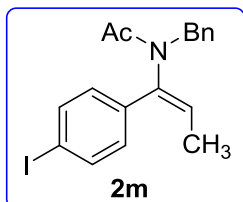

Yellow oil ([Cu] 55.2 mg, 48% yield; [Fe] 63.4 mg, 54% yield): **<sup>1</sup>H NMR** (400 MHz, CDCl<sub>3</sub>) δ 7.72 – 7.68 (m, 2H), 7.27 – 7.21 (m, 3H), 7.18 – 7.13 (m, 2H), 6.98 (d, *J* = 8.4 Hz, 2H), 5.45 (q, *J* = 7.3 Hz, 1H), 4.47 (s, 2H), 2.16 (s, 3H), 1.74 (d, *J* = 7.4 Hz, 3H); **<sup>13</sup>C NMR** (101 MHz, CDCl<sub>3</sub>) δ 170.8, 138.3, 137.7, 137.3, 134.3, 130.4, 128.7,

128.2, 127.5, 127.1, 94.1, 49.1, 22.1, 14.5;

**HRMS (ESI) m/z:**  $[M+H]^+$  Calcd for  $C_{18}H_{19}NOI^+$  392.0506, found 392.0524.

**(E)-N-benzyl-N-(1-(3-iodophenyl)prop-1-en-1-yl)acetamide (2n)**

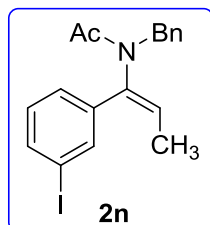

Yellow oil ([Cu] 68.1 mg, 58% yield; [Fe] 71.6 mg, 61% yield):  **$^1H$  NMR** (400 MHz,  $CDCl_3$ )  $\delta$  7.65 (d,  $J = 7.8$  Hz, 1H), 7.54 – 7.53 (m, 1H), 7.25 – 7.22 (m, 3H), 7.19 – 7.15 (m, 3H), 7.10 – 7.08 (m, 1H), 5.46 (q,  $J = 7.3$  Hz, 1H), 4.47 (s, 2H), 2.16 (s, 3H), 1.74 (d,  $J = 7.4$  Hz, 3H);  **$^{13}C$  NMR** (101 MHz,  $CDCl_3$ )  $\delta$  170.7, 137.8, 137.2, 137.2, 136.9, 130.0, 128.7, 128.1, 127.9, 127.8, 127.1, 94.3, 49.1, 22.1, 14.4;

**HRMS (ESI) m/z:**  $[M+H]^+$  Calcd for  $C_{18}H_{19}NOI^+$  392.0506, found 392.0525.

**(E)-N-benzyl-N-(1-(4-(trifluoromethyl)phenyl)prop-1-en-1-yl)acetamide (2o)**

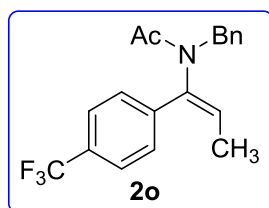

White solid ([Cu] 53.1 mg, 55% yield; [Fe] 71.0 mg, 71% yield):  **$^1H$  NMR** (400 MHz,  $CDCl_3$ )  $\delta$  7.67 (d,  $J = 8.2$  Hz, 2H), 7.39 (d,  $J = 8.1$  Hz, 2H), 7.30 – 7.24 (m, 3H), 7.21 – 7.18 (m, 2H), 5.59 (q,  $J = 7.4$  Hz, 1H), 4.52 (s, 2H), 2.22 (s, 3H), 1.81 (d,  $J = 7.4$  Hz, 3H);  **$^{13}C$  NMR** (101 MHz,  $CDCl_3$ )  $\delta$  170.8, 138.6, 138.3, 137.3, 130.3 (q,  $J = 32.5$  Hz), 129.0, 128.8, 128.7, 128.2, 127.2, 125.5 (q,  $J = 3.5$  Hz), 123.8 (q,  $J = 272.2$  Hz), 49.3, 22.1, 14.4;

**HRMS (ESI) m/z:**  $[M+H]^+$  Calcd for  $C_{19}H_{19}NOF_3^+$  334.1413, found 334.1423.

**(E)-N-benzyl-N-(1-(4-cyanophenyl)prop-1-en-1-yl)acetamide (2p)**

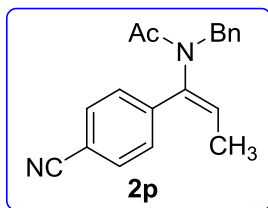

Yellow oil ([Cu] 64.5 mg, 74% yield; [Fe] 56.6 mg, 65% yield): **<sup>1</sup>H NMR** (400 MHz, CDCl<sub>3</sub>) δ 7.67 – 7.63 (m, 2H), 7.35 – 7.30 (m, 2H), 7.22 – 7.19 (m, 3H), 7.14 – 7.11 (m, 2H), 5.59 (q, *J* = 7.4 Hz, 1H), 4.47 (s, 2H), 2.15 (s, 3H), 1.77 (d, *J* = 7.4 Hz, 3H); **<sup>13</sup>C NMR** (101 MHz, CDCl<sub>3</sub>) δ 170.7, 139.5, 137.9, 137.0, 132.2, 129.6, 129.2, 128.7, 128.2, 127.3, 126.2, 118.3, 111.9, 49.4, 22.0, 14.5; **HRMS (ESI) m/z:** [M+H]<sup>+</sup> Calcd for C<sub>19</sub>H<sub>19</sub>N<sub>2</sub>O<sup>+</sup> 291.1492, found 291.1506.

**(*E*)-*N*-(4-methylbenzyl)-*N*-(1-phenylprop-1-en-1-yl)acetamide (2q)**

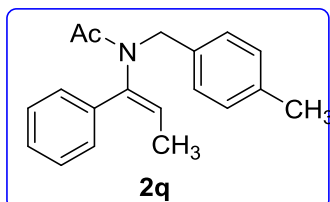

Yellow oil ([Cu] 60.4 mg, 72% yield; [Fe] 62.9 mg, 75% yield): **<sup>1</sup>H NMR** (400 MHz, CDCl<sub>3</sub>) δ 7.45 – 7.36 (m, 3H), 7.32 – 7.28 (m, 2H), 7.13 – 7.09 (m, 4H), 5.46 (q, *J* = 7.3 Hz, 1H), 4.47 (s, 2H), 2.35 (s, 3H), 2.22 (s, 3H), 1.80 (d, *J* = 7.3 Hz, 3H); **<sup>13</sup>C NMR** (101 MHz, CDCl<sub>3</sub>) δ 170.8, 139.1, 136.5, 134.7, 134.5, 128.8, 128.7, 128.6, 128.4, 128.3, 126.7, 48.7, 22.1, 21.0, 14.4; **HRMS (ESI) m/z:** [M+H]<sup>+</sup> Calcd for C<sub>19</sub>H<sub>22</sub>NO<sup>+</sup> 280.1696, found 280.1709.

**(*E*)-*N*-methyl-*N*-(1-phenylprop-1-en-1-yl)acetamide (2r)**

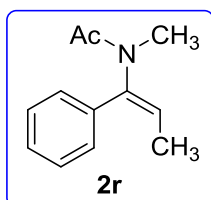

Yellow oil ([Cu] 34.6 mg, 61% yield; [Fe] 30.1 mg, 53% yield): **<sup>1</sup>H NMR** (400 MHz, CDCl<sub>3</sub>) δ 7.38 – 7.33 (m, 2H), 7.32 – 7.29 (m, 1H), 7.28 – 7.24 (m, 2H), 5.73 (q, *J* = 7.3 Hz, 1H), 2.93 (s, 3H), 2.07 (s, 3H), 1.85 (d, *J* = 7.4 Hz, 3H); **<sup>13</sup>C NMR** (101 MHz, CDCl<sub>3</sub>) δ 171.1, 141.6, 134.9, 128.4, 128.3, 128.2, 124.4, 35.0, 21.8, 14.3;

**HRMS (ESI) m/z:** [M+H]<sup>+</sup> Calcd for C<sub>12</sub>H<sub>16</sub>NO<sup>+</sup> 190.1226, found 190.1235.

## 9. $^1\text{H}$ NMR and $^{13}\text{C}$ NMR spectra of the products

### (*E*)-*N*-benzyl-*N*-(1-phenylprop-1-en-1-yl)acetamide (2a)

$^1\text{H}$  NMR (400 MHz,  $\text{CDCl}_3$ )

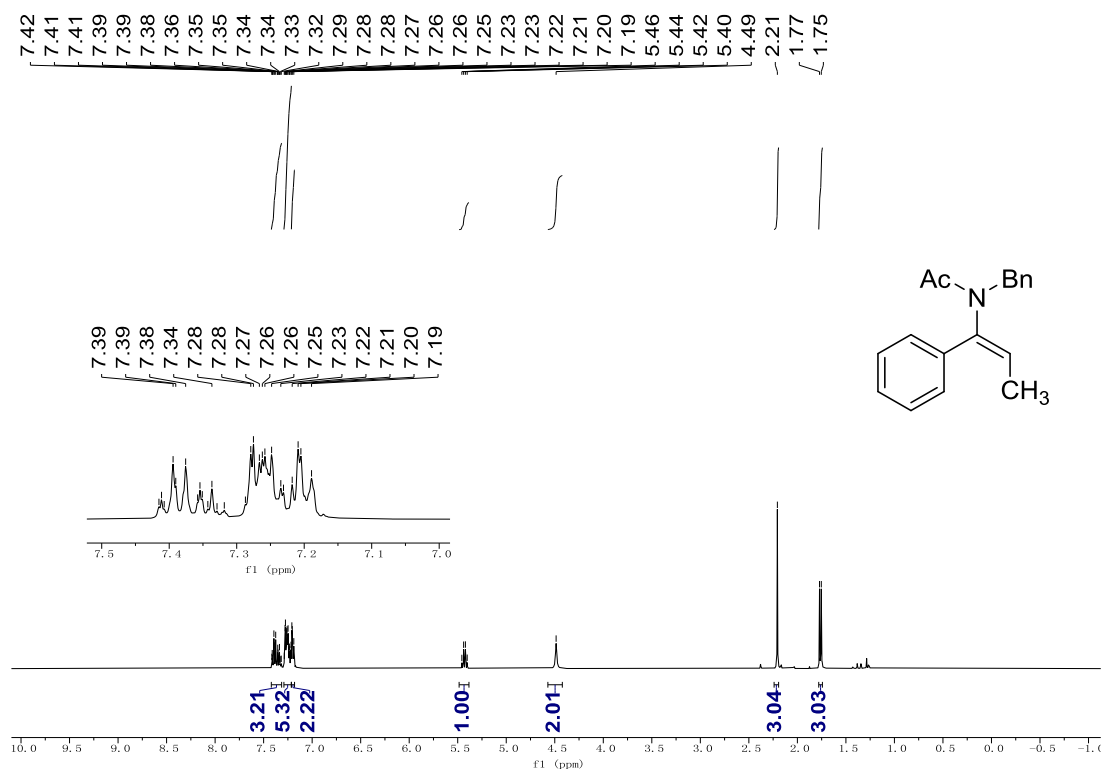

$^{13}\text{C}$  NMR (101 MHz,  $\text{CDCl}_3$ )

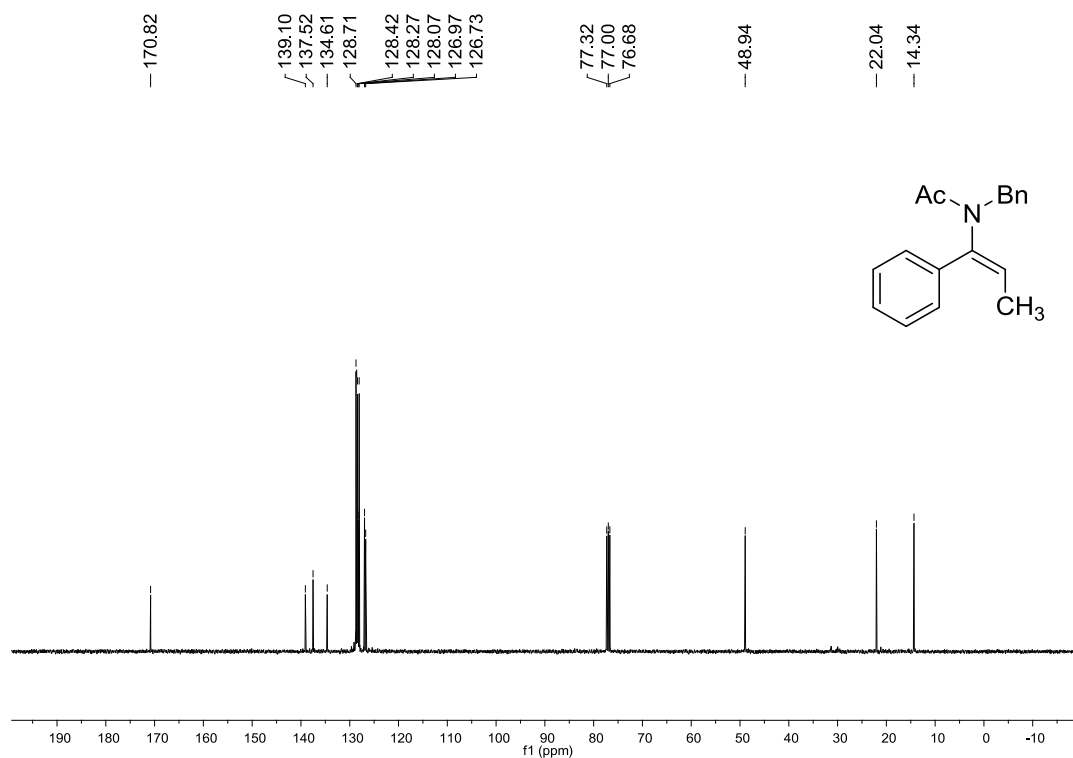

**(E)-N-benzyl-N-(1-(p-tolyl)prop-1-en-1-yl)acetamide (2b)**

<sup>1</sup>H NMR (400 MHz, CDCl<sub>3</sub>)

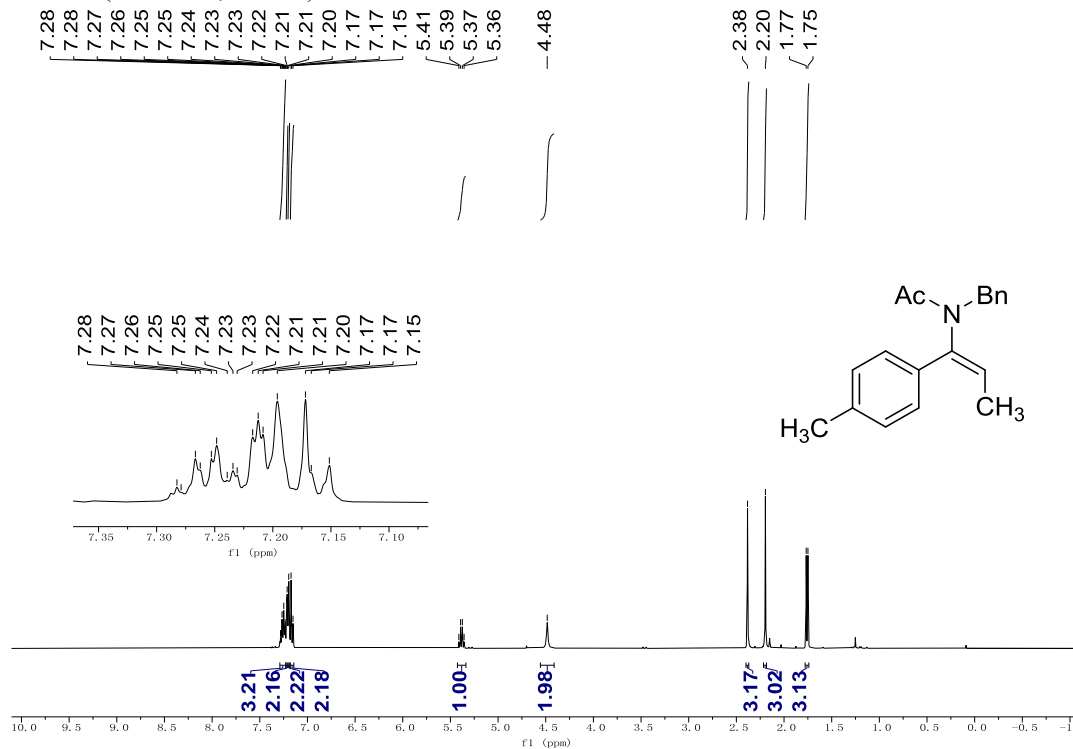

<sup>13</sup>C NMR (101 MHz, CDCl<sub>3</sub>)

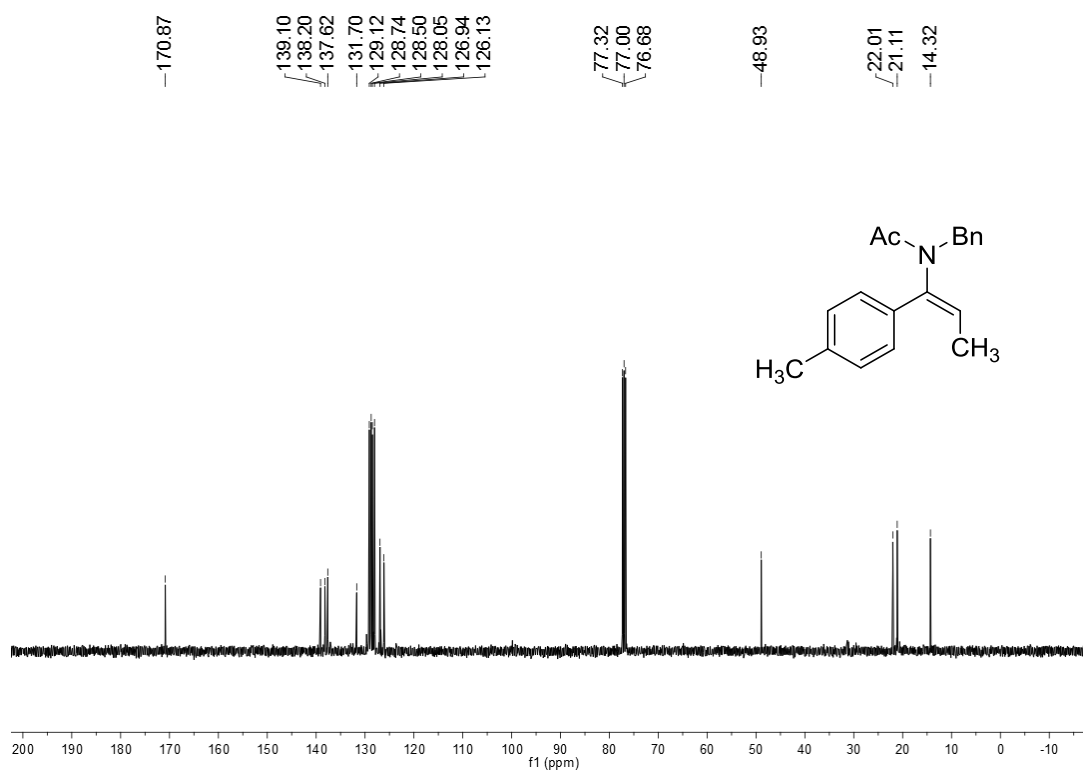



**(E)-N-benzyl-N-(1-(o-tolyl)prop-1-en-1-yl)acetamide (2c)**

<sup>1</sup>H NMR (400 MHz, CDCl<sub>3</sub>)

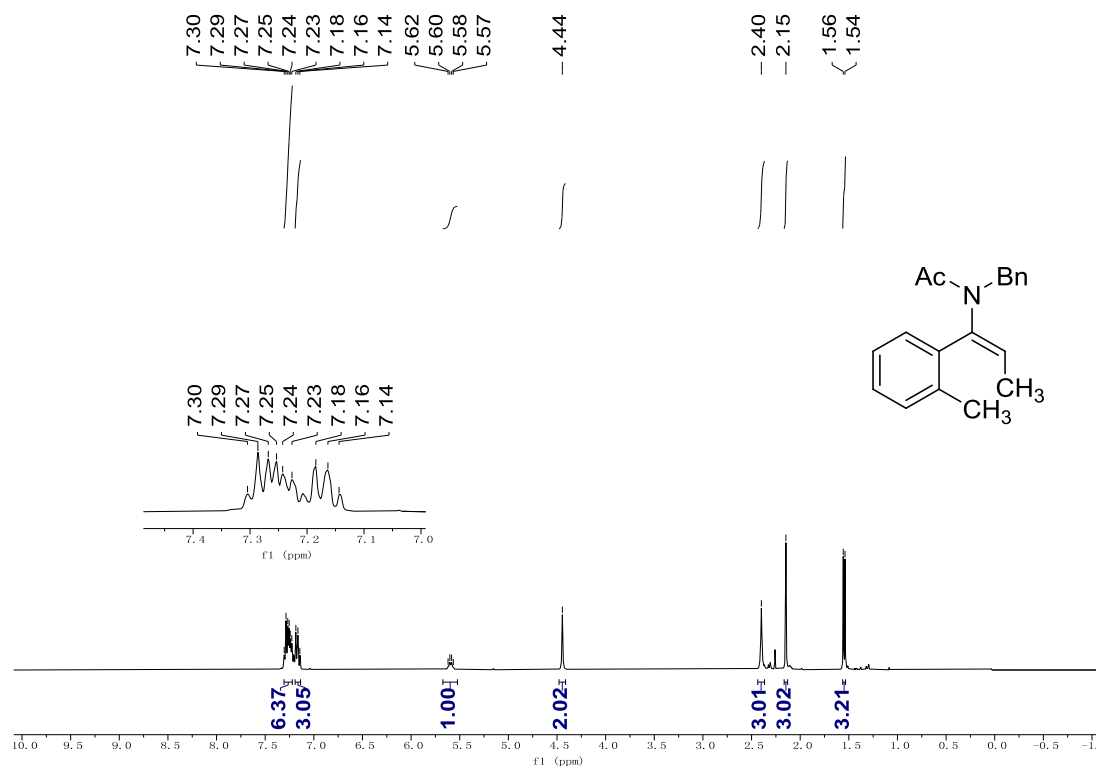

<sup>13</sup>C NMR (101 MHz, CDCl<sub>3</sub>)

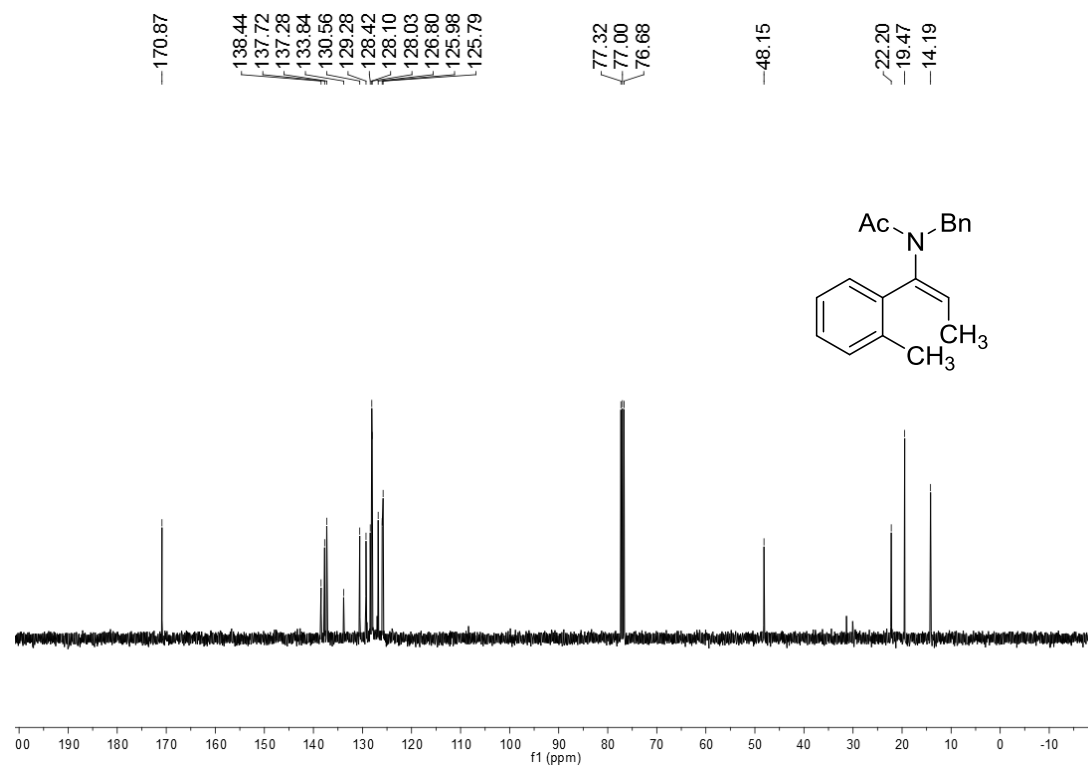

**(E)-N-(1-([1,1'-biphenyl]-4-yl)prop-1-en-1-yl)-N-benzylacetamide (2d)**

<sup>1</sup>H NMR (400 MHz, CDCl<sub>3</sub>)

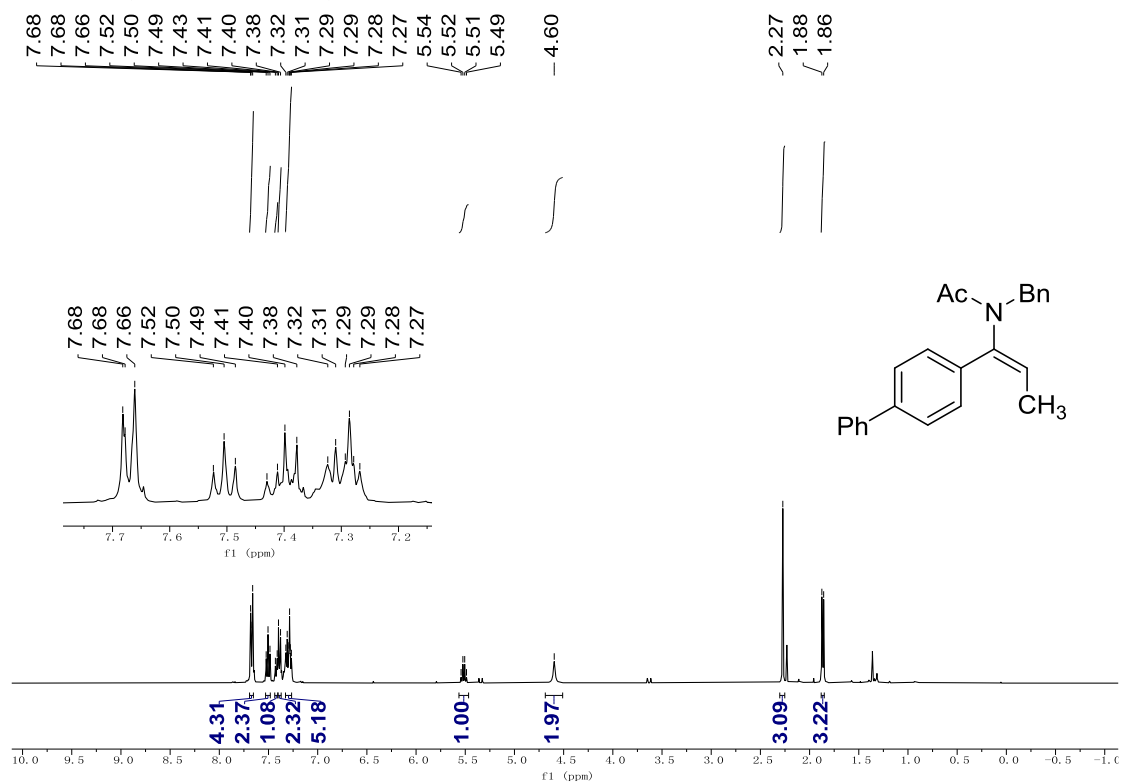

<sup>13</sup>C NMR (101 MHz, CDCl<sub>3</sub>)

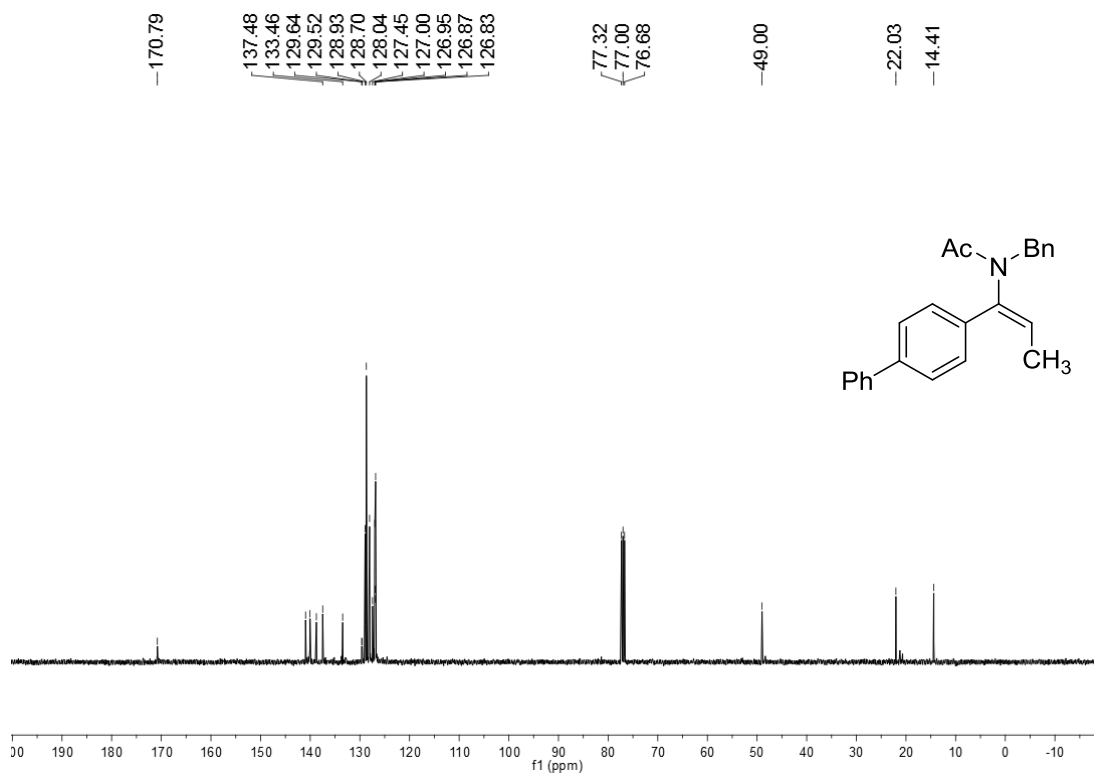

**(E)-N-benzyl-N-(1-(4-methoxyphenyl)prop-1-en-1-yl)acetamide (2e)**

<sup>1</sup>H NMR (400 MHz, CDCl<sub>3</sub>)

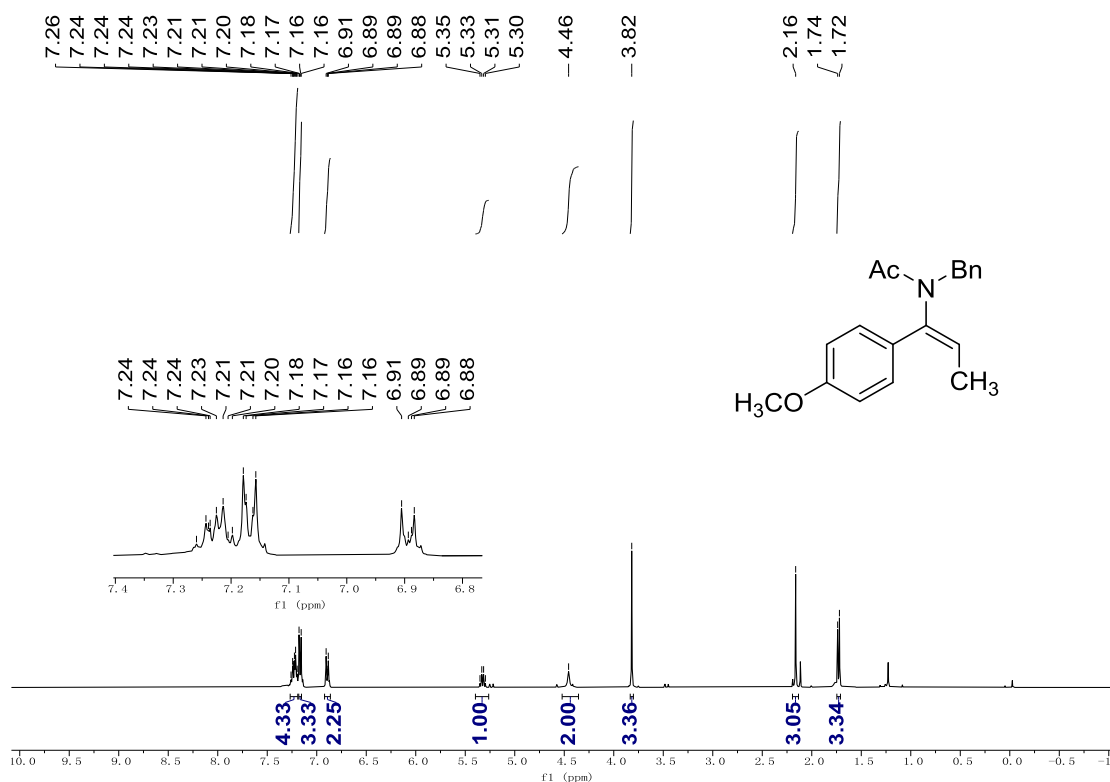

<sup>13</sup>C NMR (101 MHz, CDCl<sub>3</sub>)

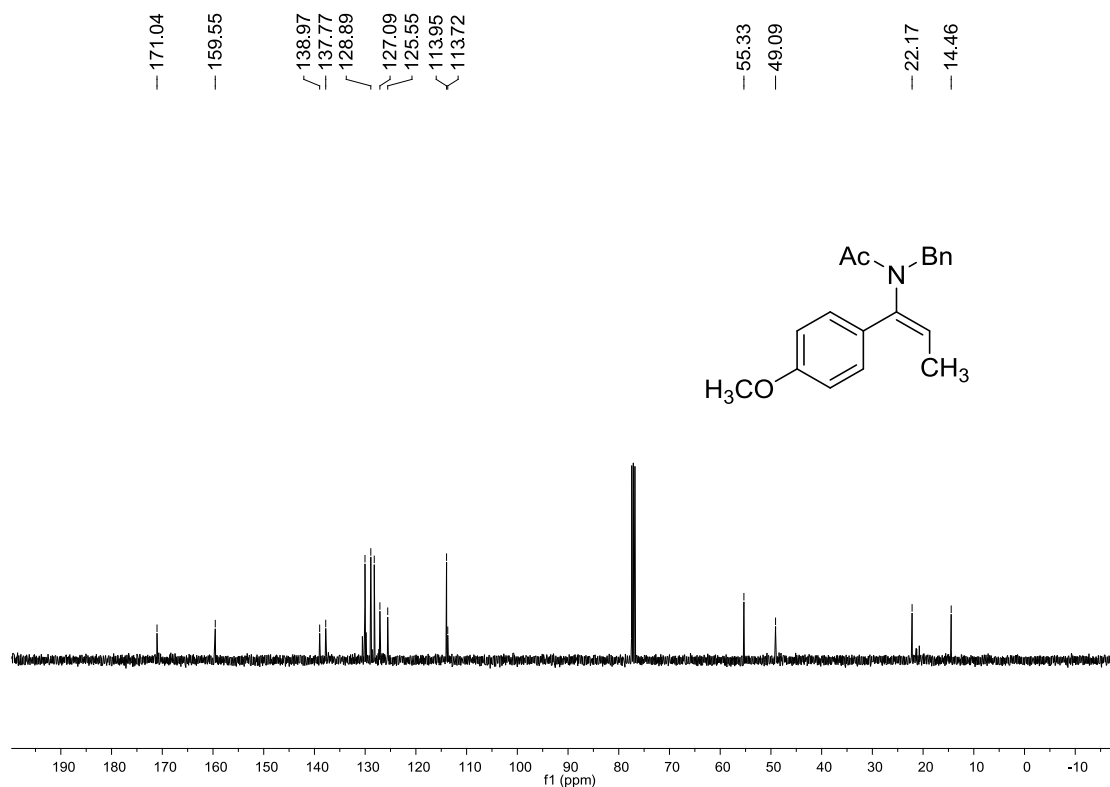

**(E)-N-benzyl-N-(1-(3-methoxyphenyl)prop-1-en-1-yl)acetamide (2f)**

<sup>1</sup>H NMR (400 MHz, CDCl<sub>3</sub>)

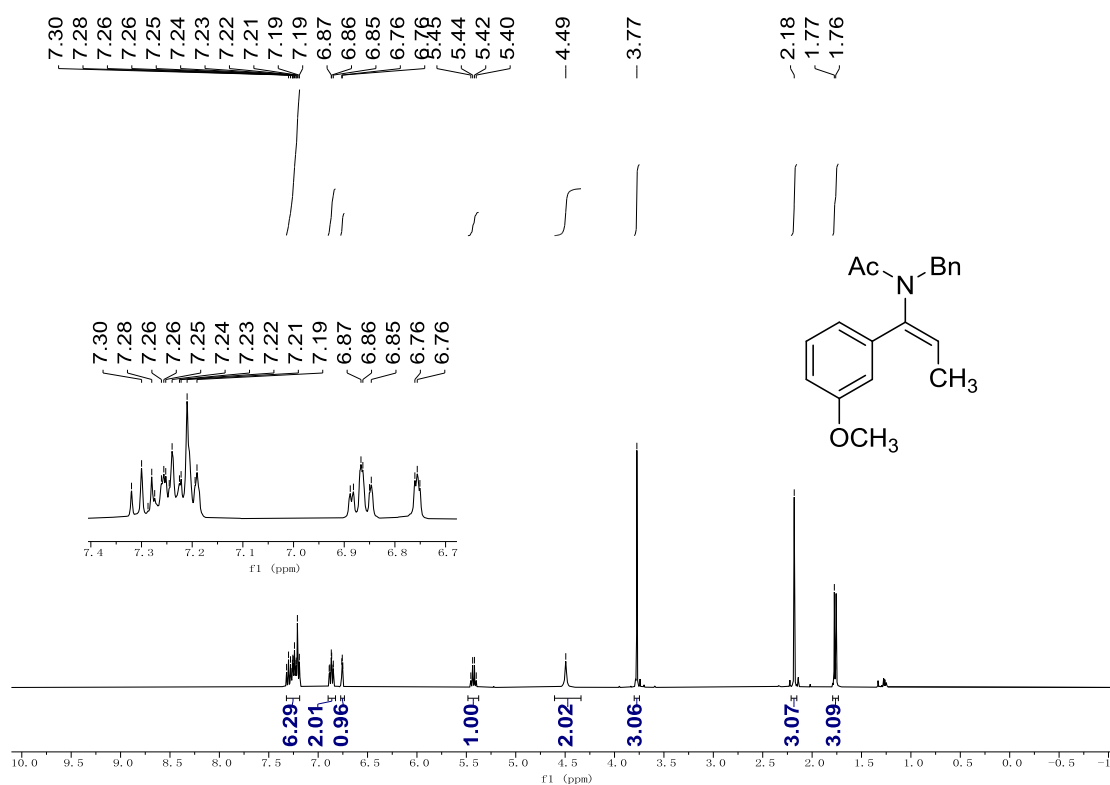

<sup>13</sup>C NMR (101 MHz, CDCl<sub>3</sub>)

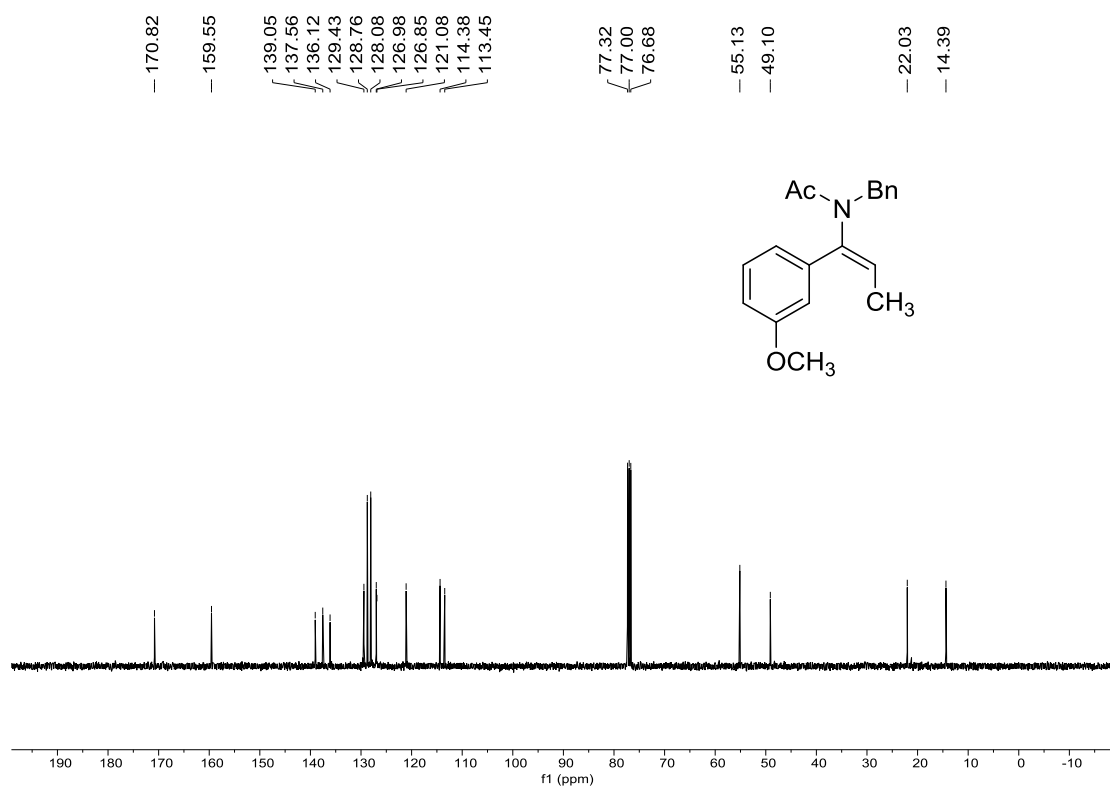

**(E)-N-benzyl-N-(1-(2,4-dimethoxyphenyl)prop-1-en-1-yl)acetamide (2g)**

<sup>1</sup>H NMR (400 MHz, CDCl<sub>3</sub>)

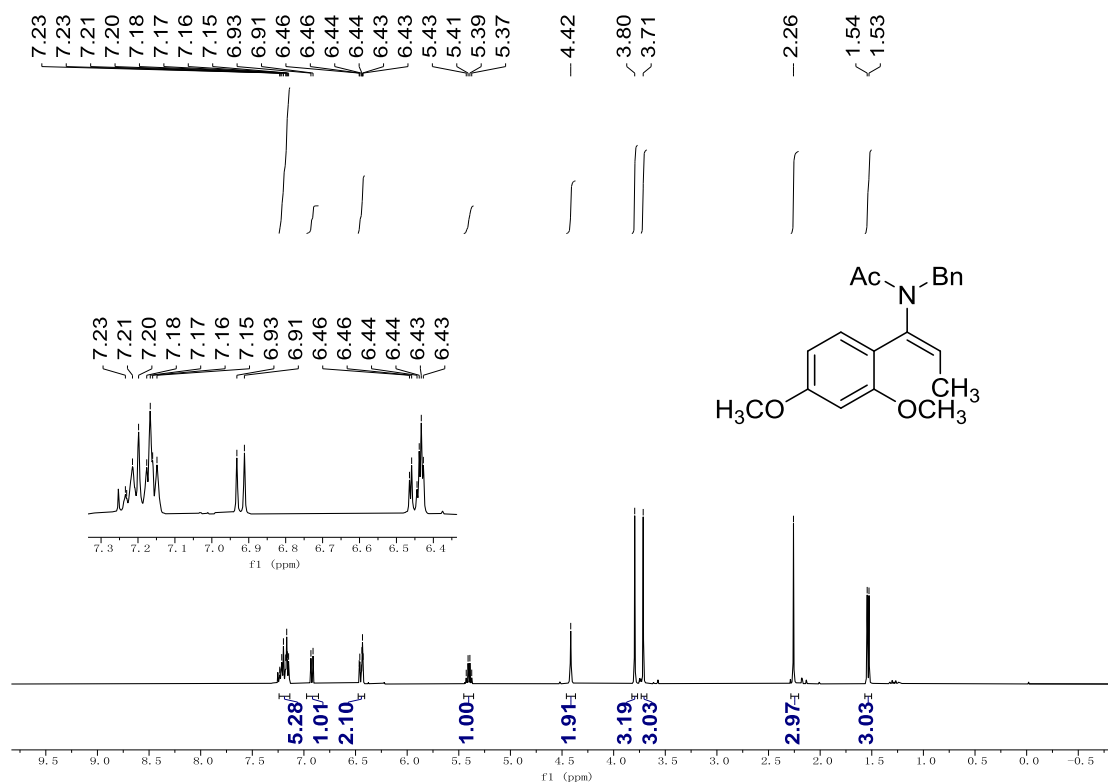

<sup>13</sup>C NMR (101 MHz, CDCl<sub>3</sub>)

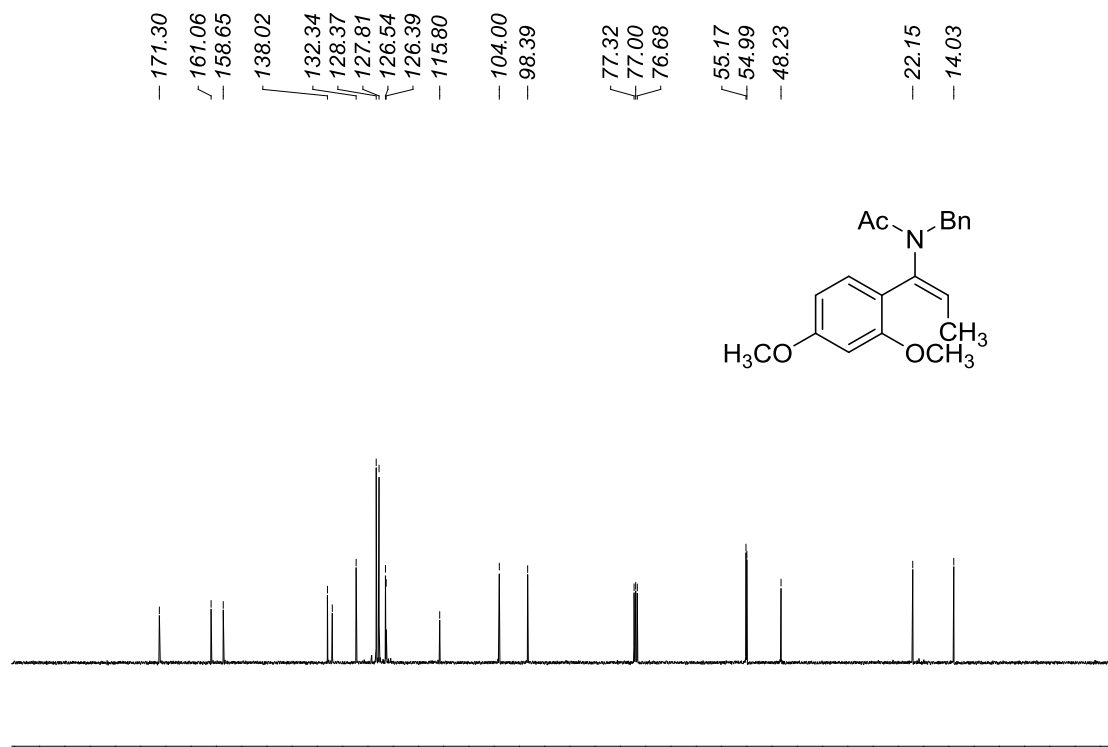

**(E)-N-benzyl-N-(1-(3,4,5-trimethoxyphenyl)prop-1-en-1-yl)acetamide (2h)**

<sup>1</sup>H NMR (400 MHz, CDCl<sub>3</sub>)

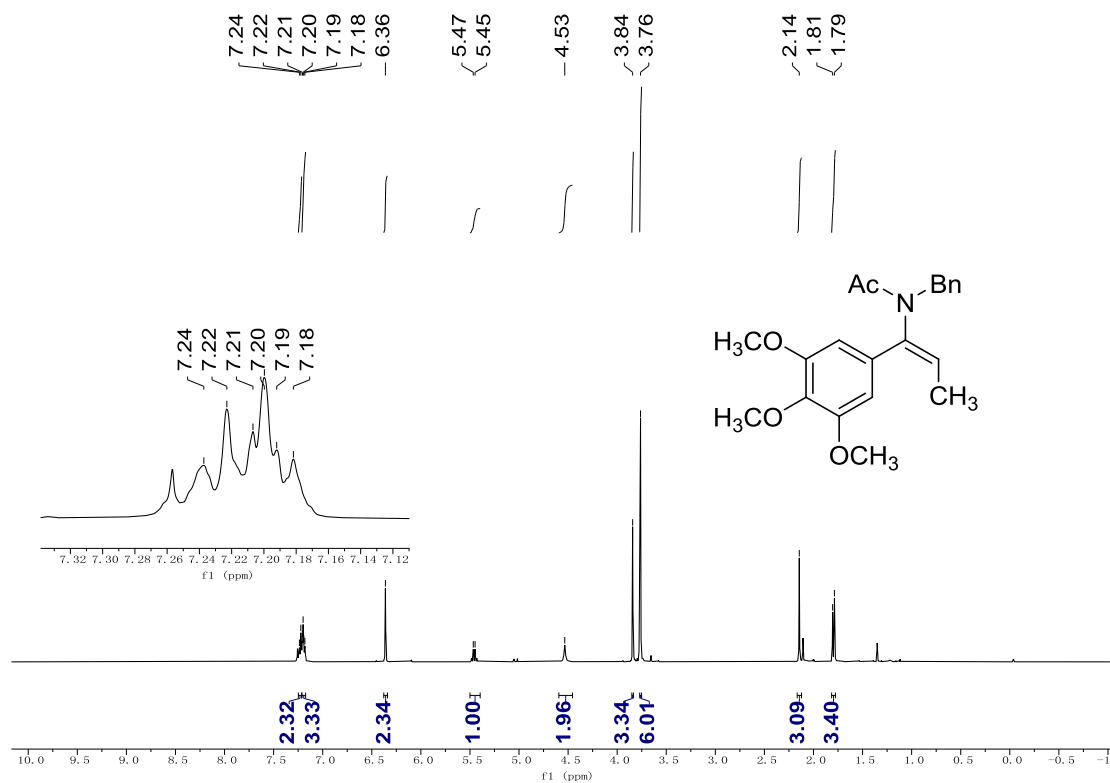

<sup>13</sup>C NMR (101 MHz, CDCl<sub>3</sub>)

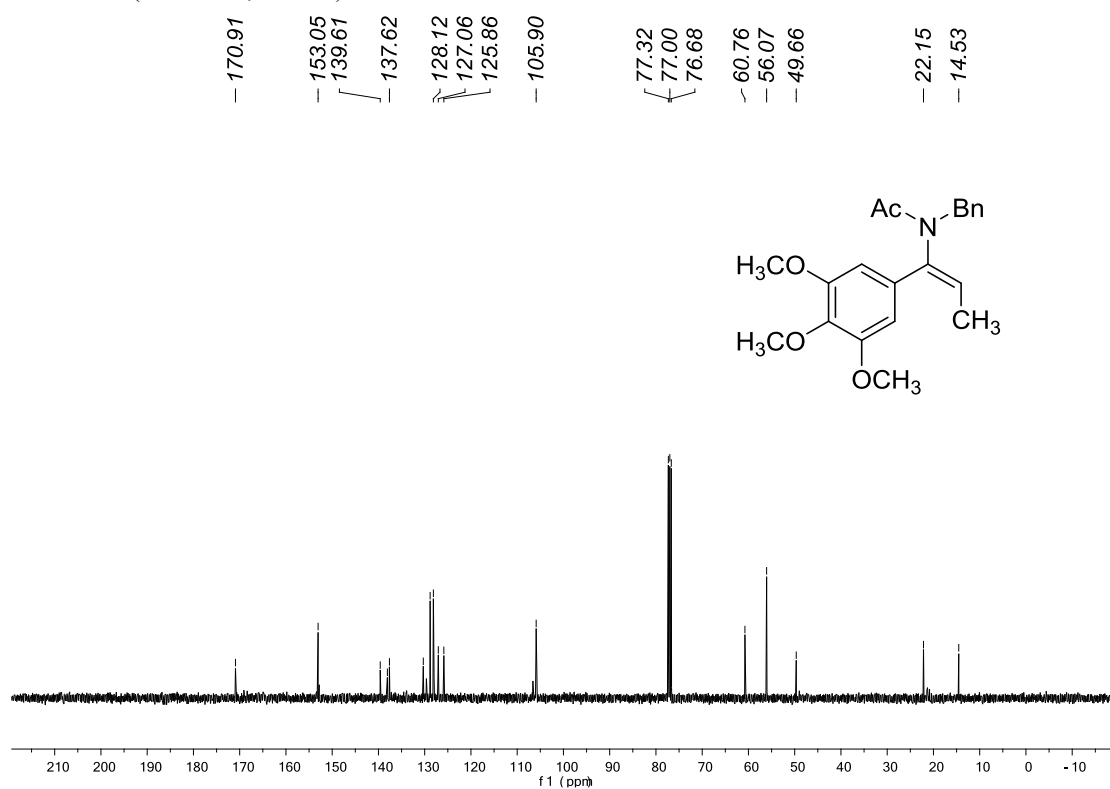

**(E)-N-benzyl-N-(1-(4-fluorophenyl)prop-1-en-1-yl)acetamide (2i)**

<sup>1</sup>H NMR (400 MHz, CDCl<sub>3</sub>)

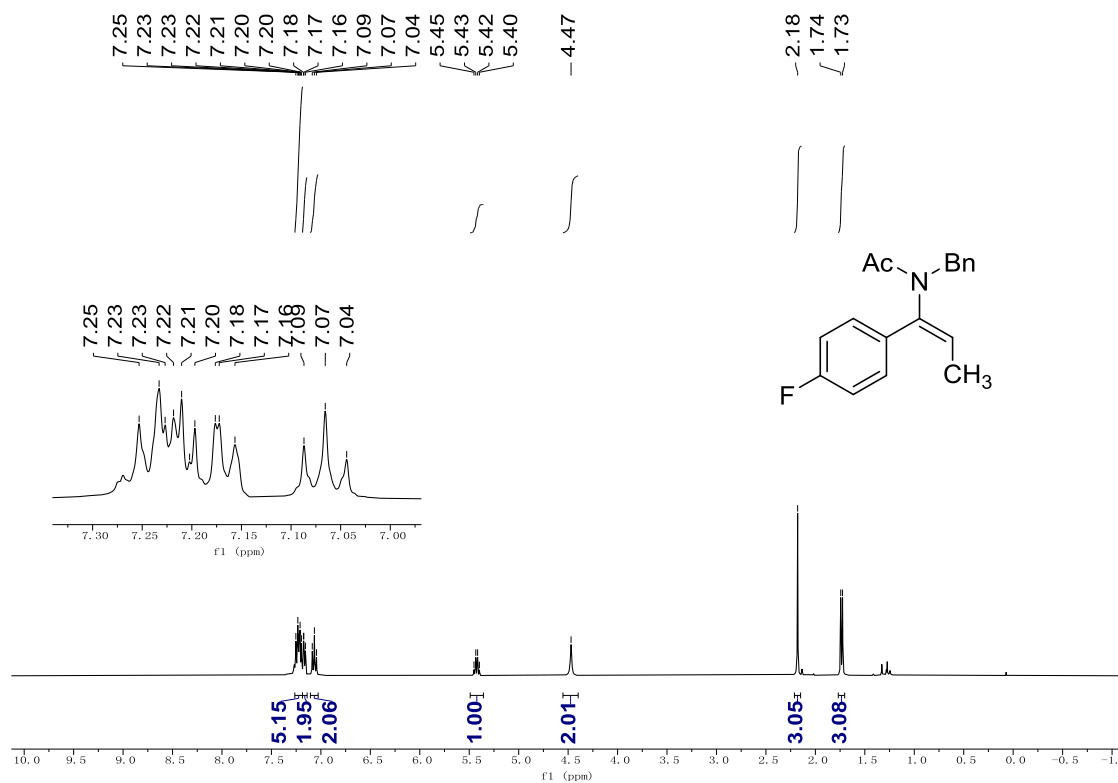

<sup>13</sup>C NMR (101 MHz, CDCl<sub>3</sub>)

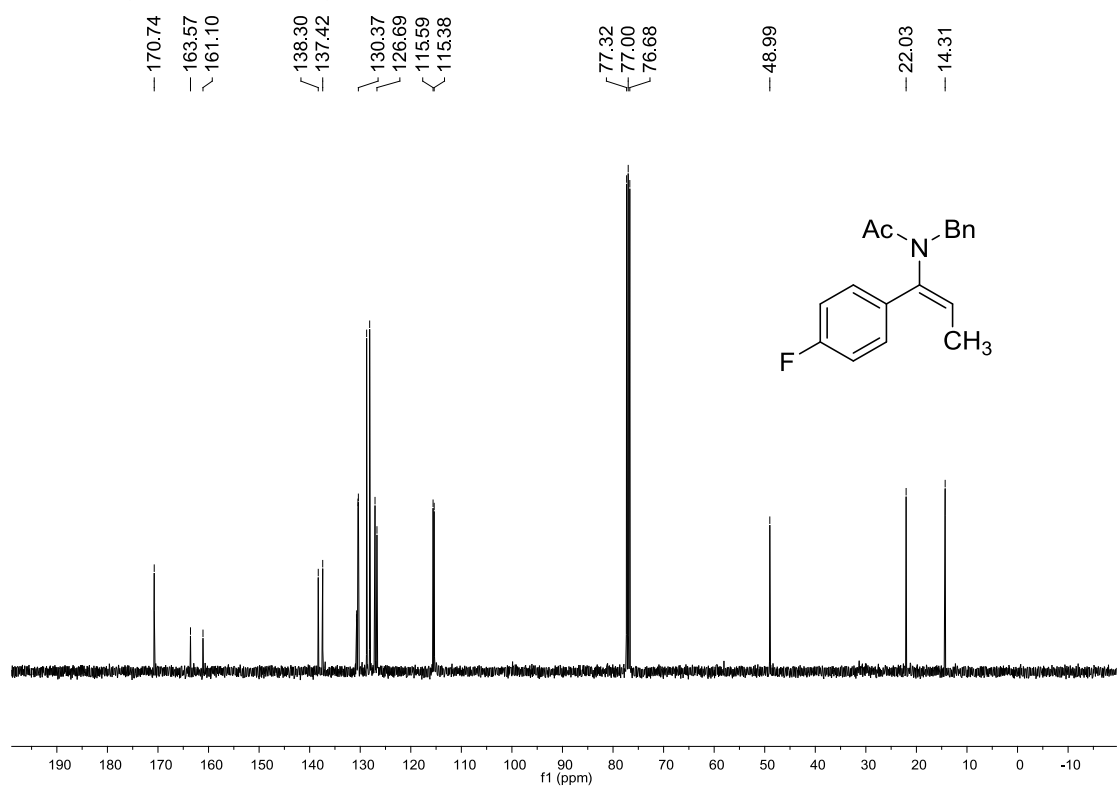

**(E)-N-benzyl-N-(1-(4-chlorophenyl)prop-1-en-1-yl)acetamide (2j)**

<sup>1</sup>H NMR (400 MHz, CDCl<sub>3</sub>)

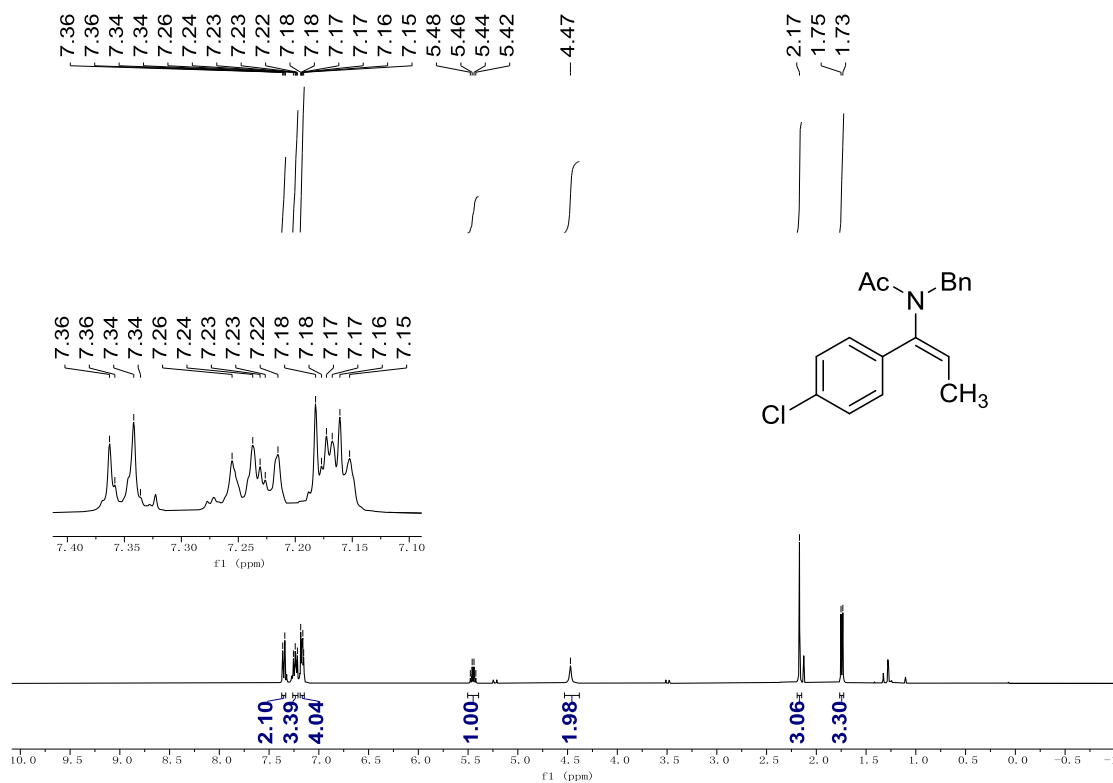

<sup>13</sup>C NMR (101 MHz, CDCl<sub>3</sub>)

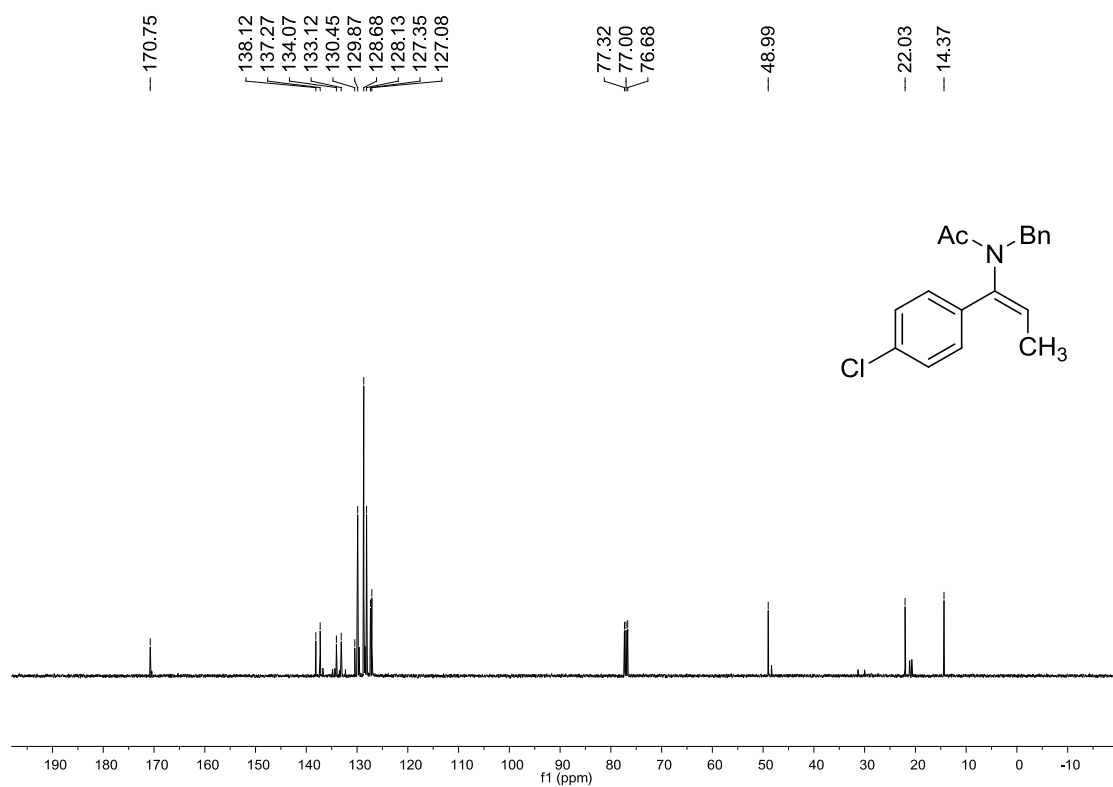



**(E)-N-benzyl-N-(1-(4-bromophenyl)prop-1-en-1-yl)acetamide (2k)**

<sup>1</sup>H NMR (400 MHz, CDCl<sub>3</sub>)

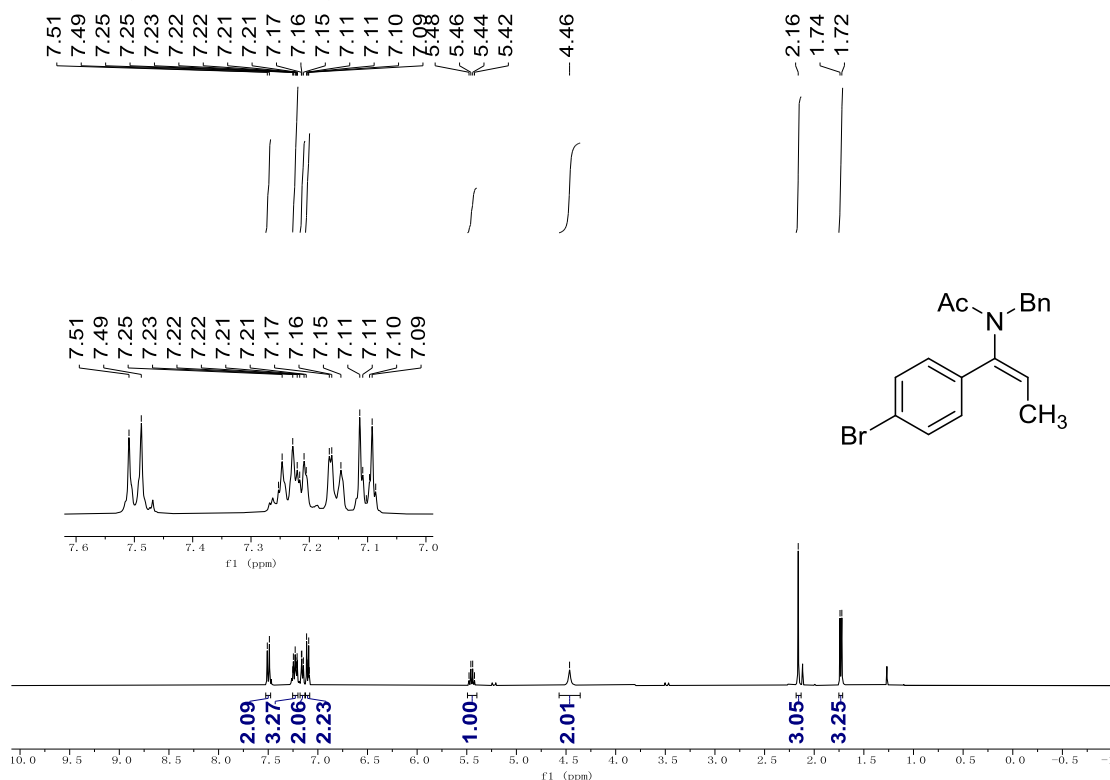

<sup>13</sup>C NMR (101 MHz, CDCl<sub>3</sub>)

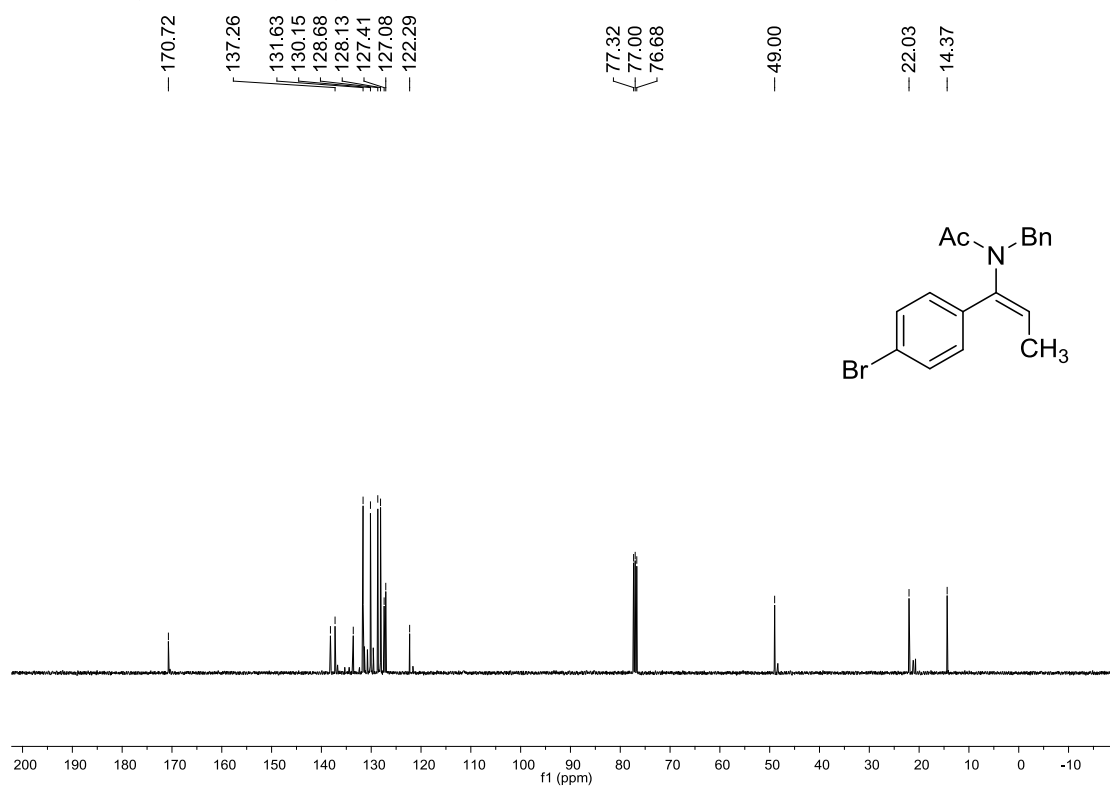

**(E)-N-benzyl-N-(1-(3-bromophenyl)prop-1-en-1-yl)acetamide (21)**

<sup>1</sup>H NMR (400 MHz, CDCl<sub>3</sub>)

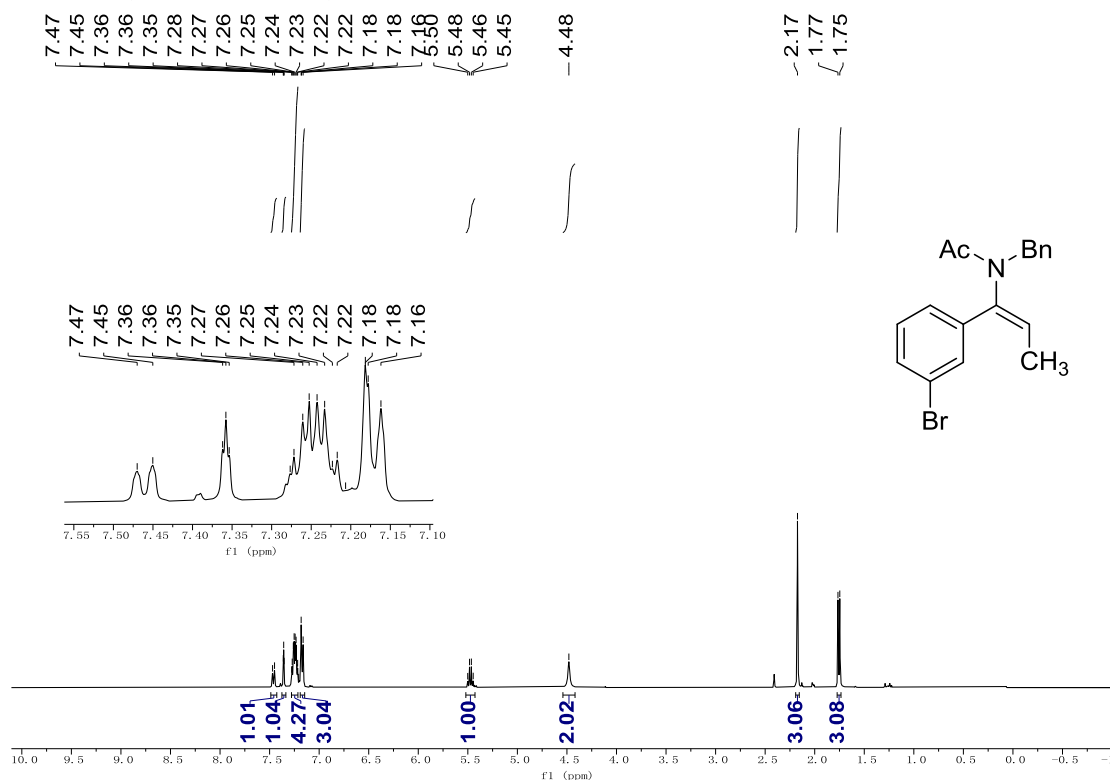

<sup>13</sup>C NMR (101 MHz, CDCl<sub>3</sub>)

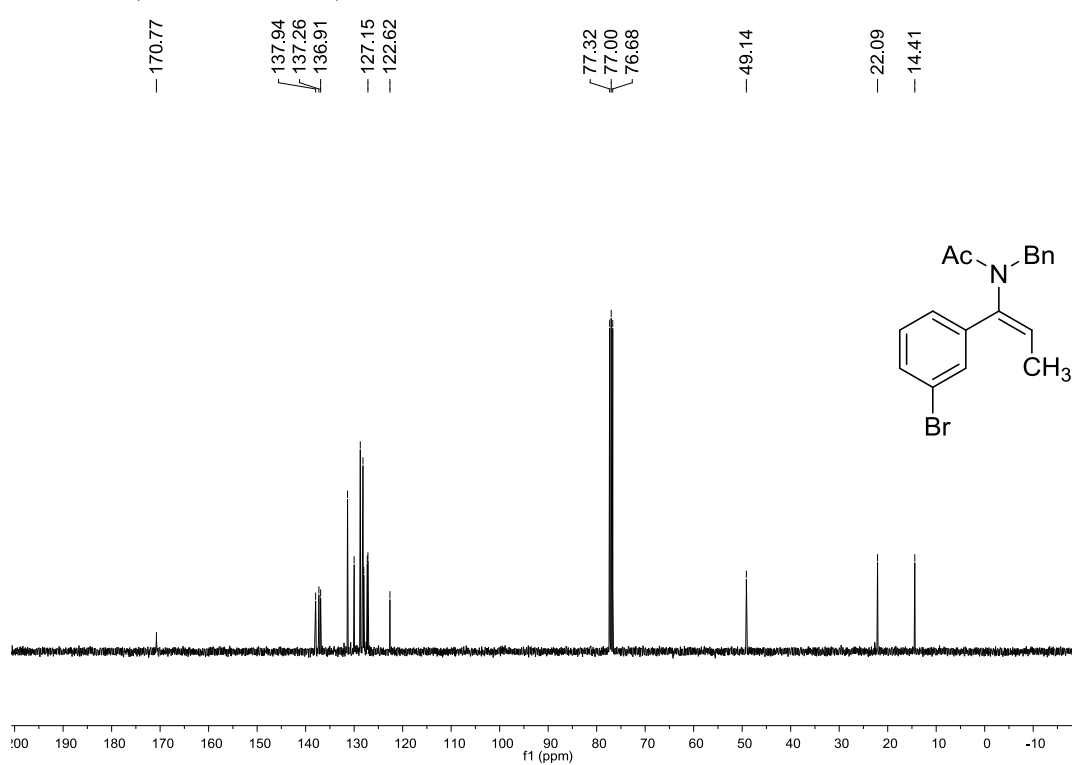

**(E)-N-benzyl-N-(1-(4-iodophenyl)prop-1-en-1-yl)acetamide (2m)**

<sup>1</sup>H NMR (400 MHz, CDCl<sub>3</sub>)

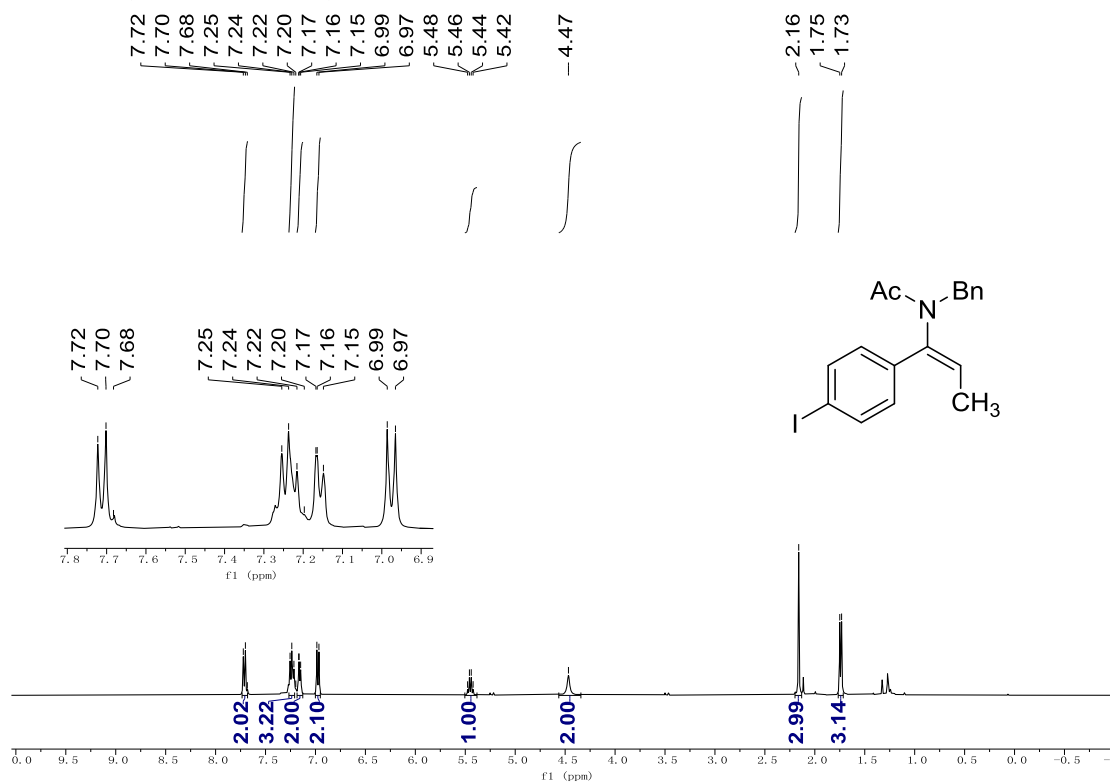

<sup>13</sup>C NMR (101 MHz, CDCl<sub>3</sub>)

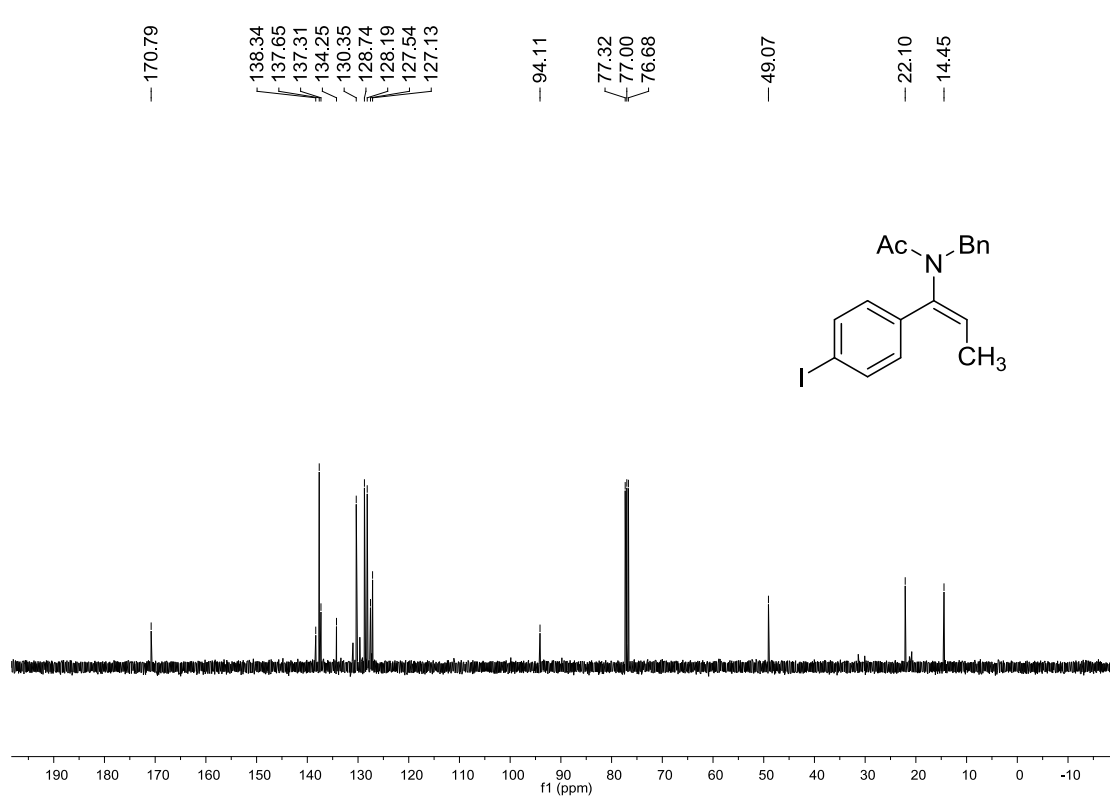

**(E)-N-benzyl-N-(1-(3-iodophenyl)prop-1-en-1-yl)acetamide (2n)**

<sup>1</sup>H NMR (400 MHz, CDCl<sub>3</sub>)

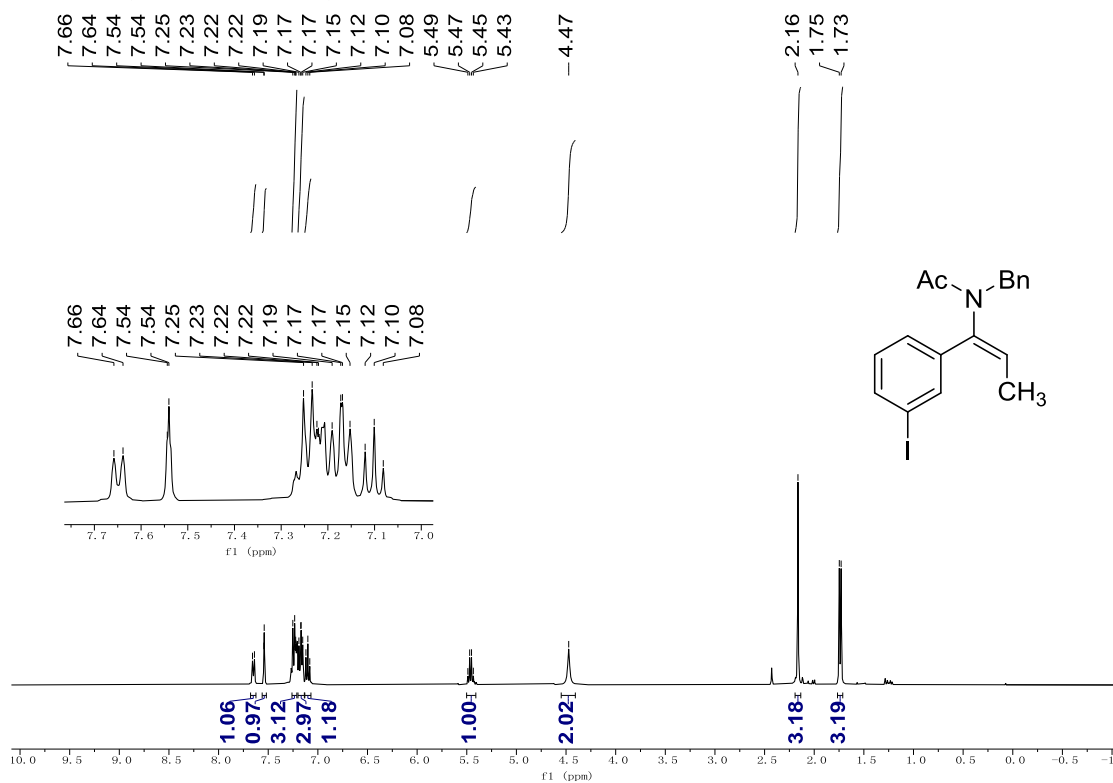

<sup>13</sup>C NMR (101 MHz, CDCl<sub>3</sub>)

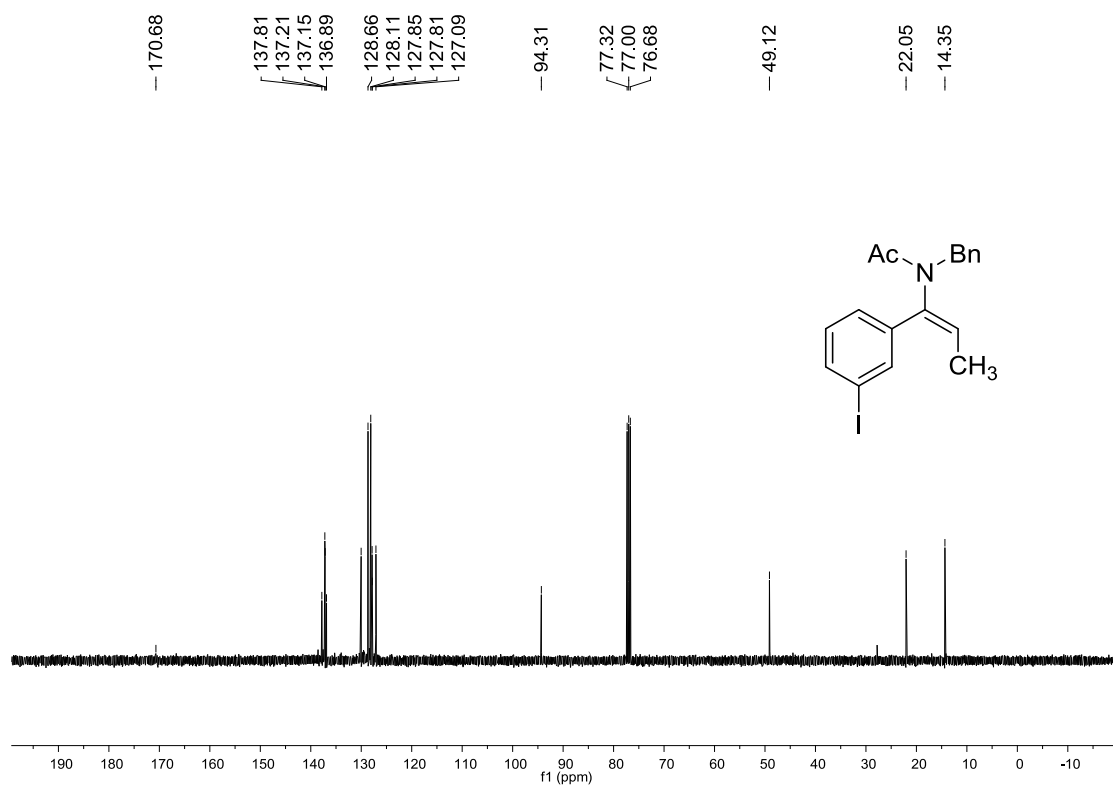

**(E)-N-benzyl-N-(1-(4-(trifluoromethyl)phenyl)prop-1-en-1-yl)acetamide (2o)**

<sup>1</sup>H NMR (400 MHz, CDCl<sub>3</sub>)

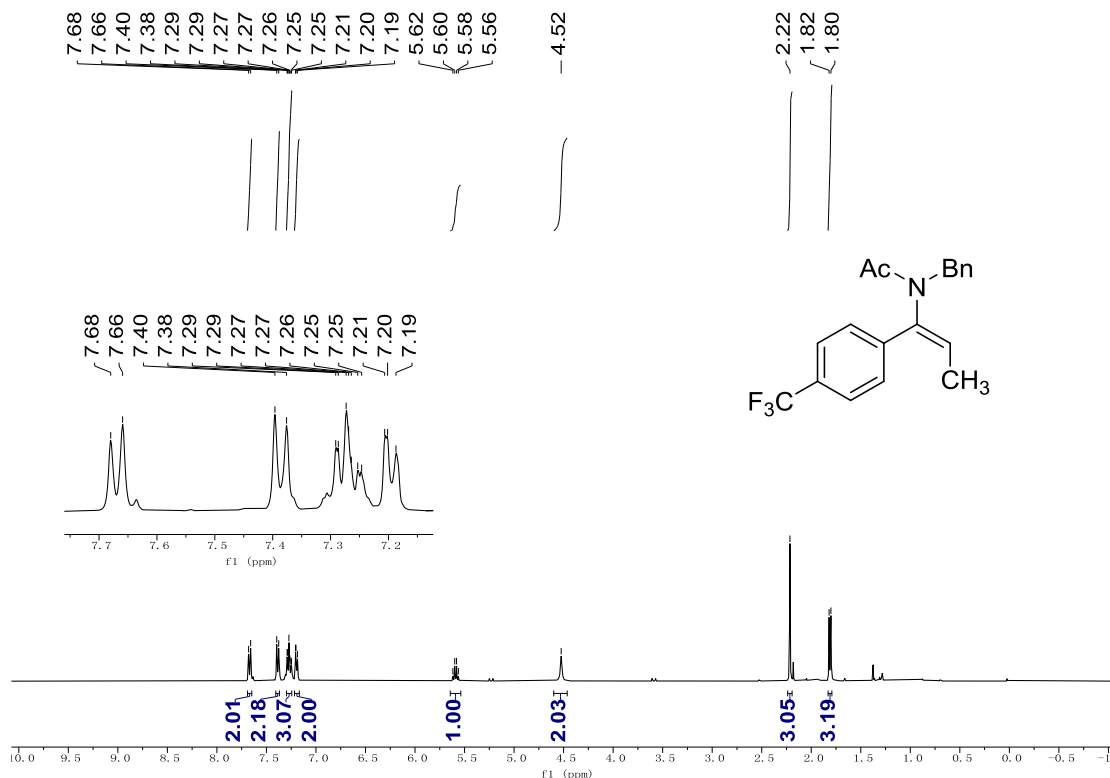

<sup>13</sup>C NMR (101 MHz, CDCl<sub>3</sub>)

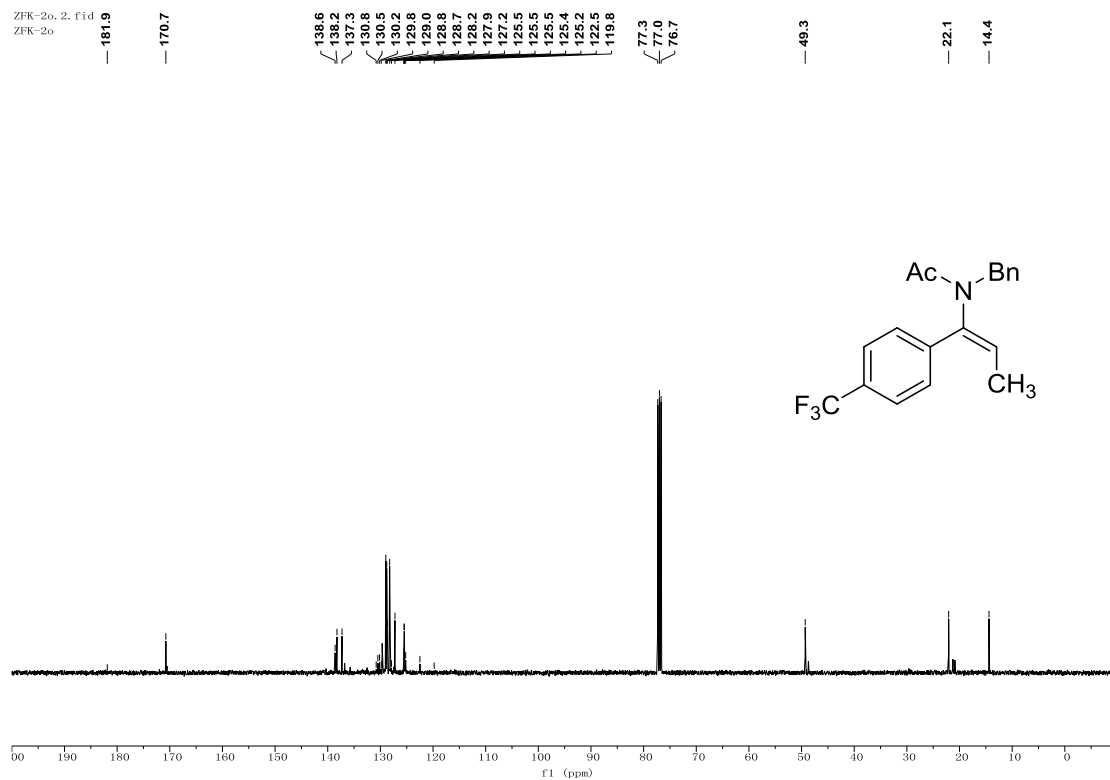

**(E)-N-benzyl-N-(1-(4-cyanophenyl)prop-1-en-1-yl)acetamide (2p)**

<sup>1</sup>H NMR (400 MHz, CDCl<sub>3</sub>)

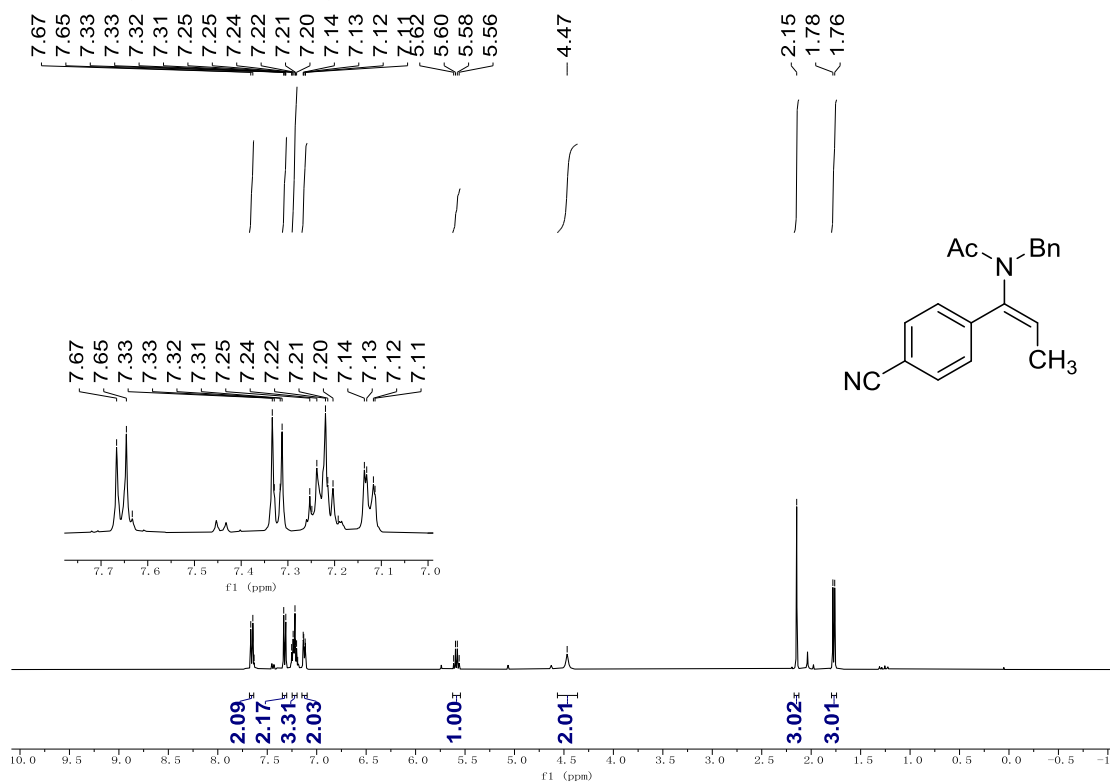

<sup>13</sup>C NMR (101 MHz, CDCl<sub>3</sub>)

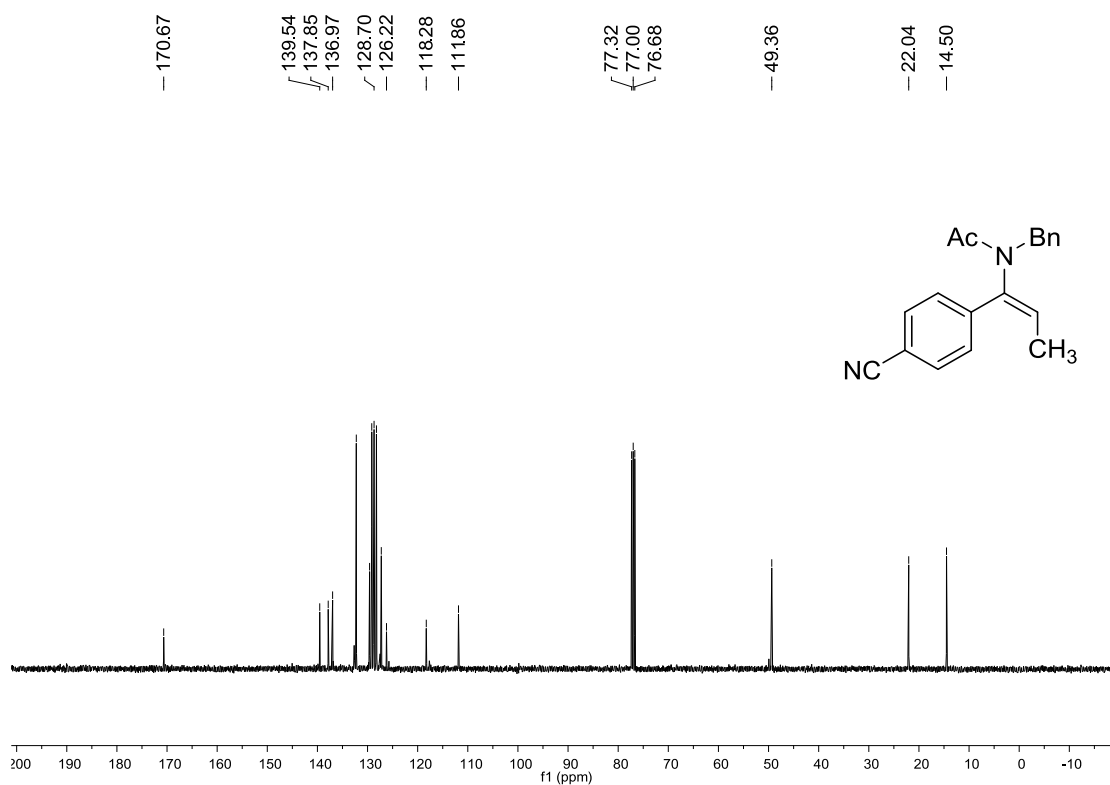

**(E)-N-(4-methylbenzyl)-N-(1-phenylprop-1-en-1-yl)acetamide (2q)**

<sup>1</sup>H NMR (400 MHz, CDCl<sub>3</sub>)

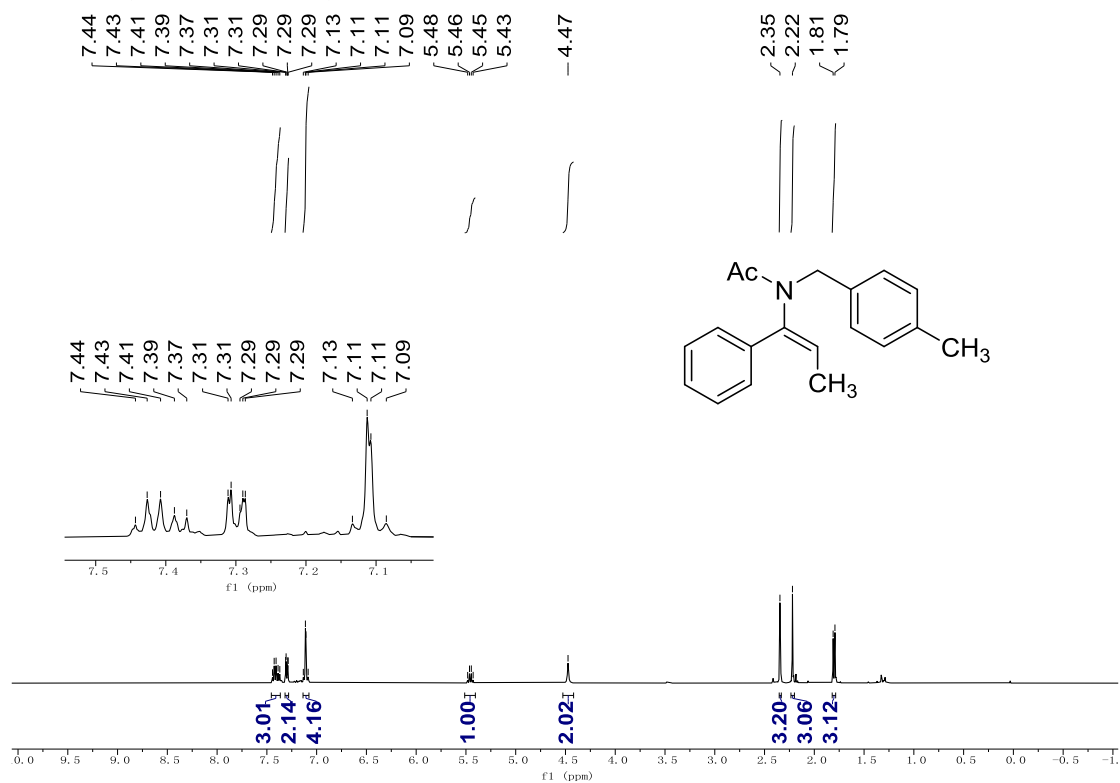

<sup>13</sup>C NMR (101 MHz, CDCl<sub>3</sub>)

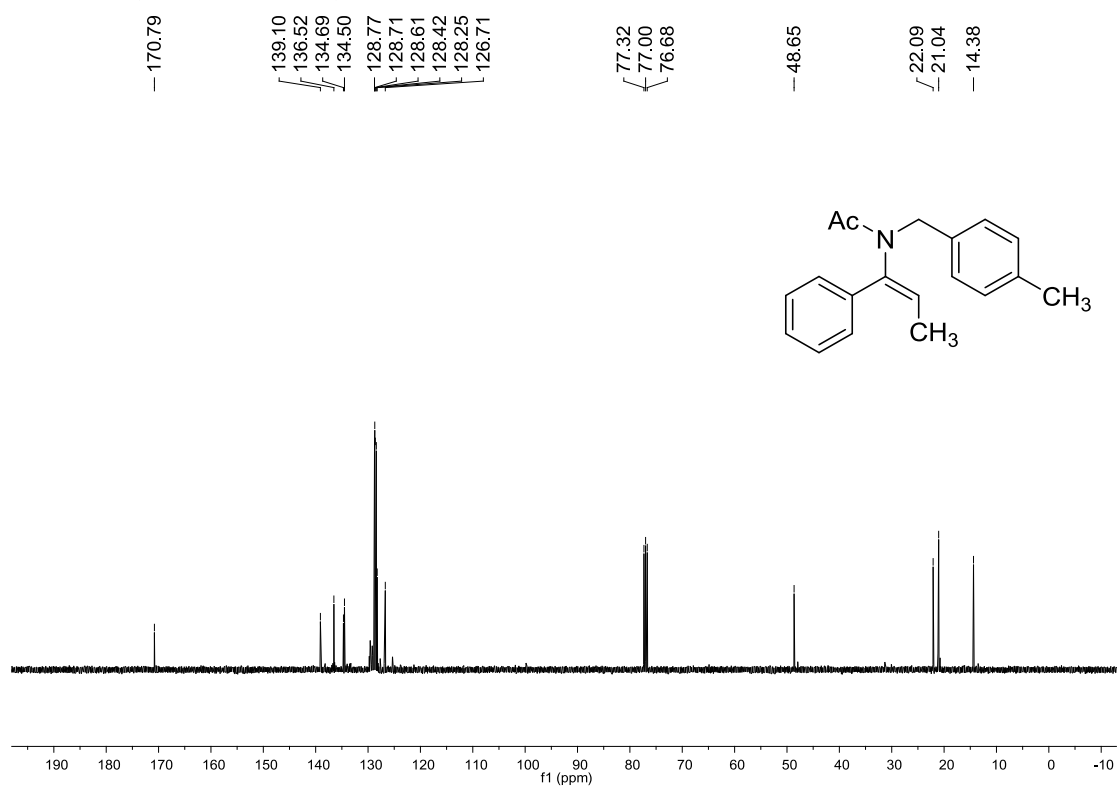

**(E)-N-methyl-N-(1-phenylprop-1-en-1-yl)acetamide (2r)**

<sup>1</sup>H NMR (400 MHz, CDCl<sub>3</sub>)

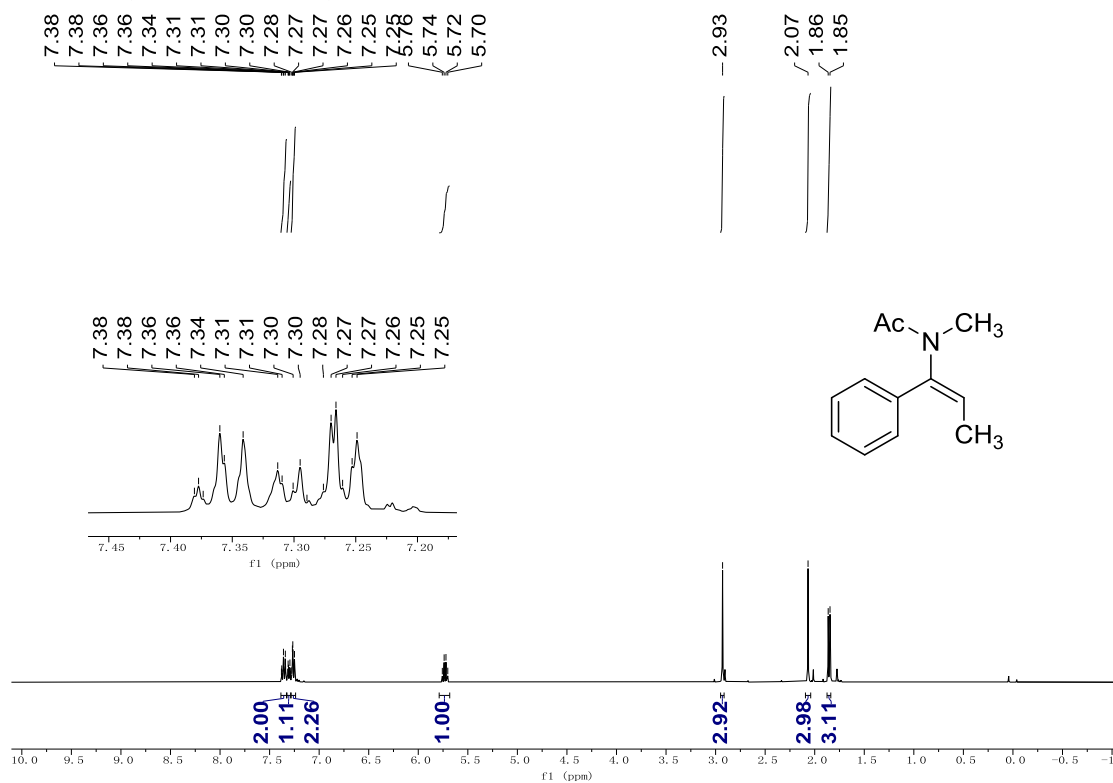

<sup>13</sup>C NMR (101 MHz, CDCl<sub>3</sub>)

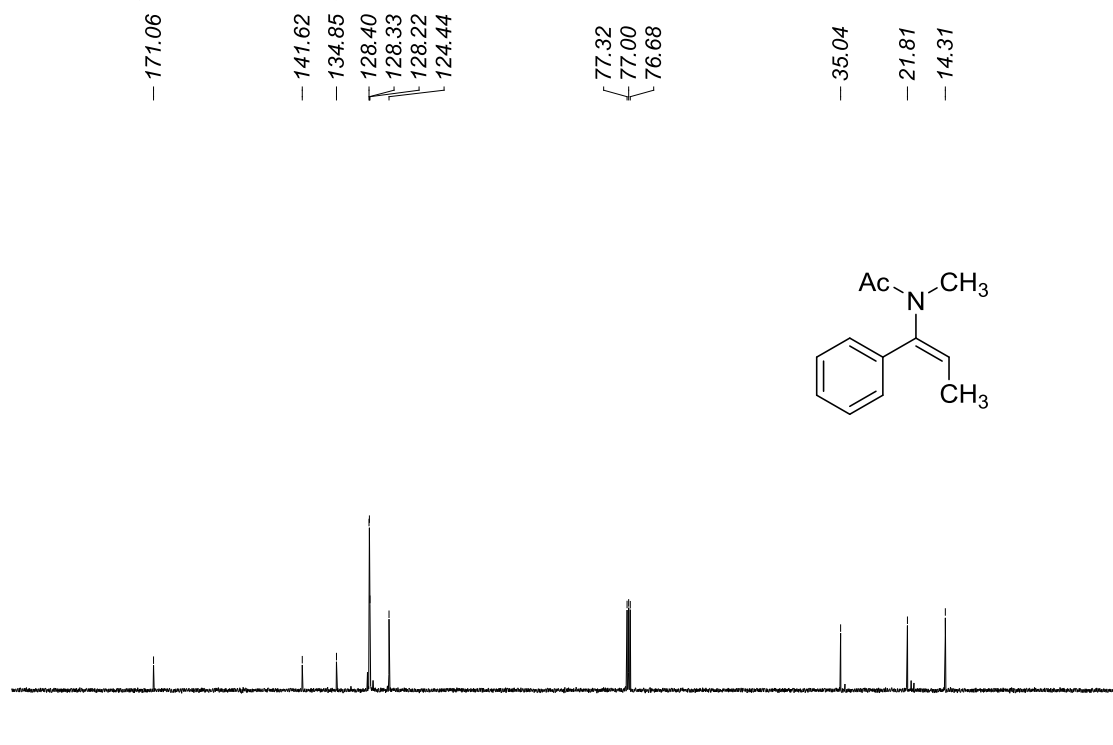

Supplement: d3nj02949b1.pdf [file d3nj02949b1.pdf]
